# Supplementary material for: Borax - and tannic acid-based post-3D-printing treatment to tune the mechanical properties of scaffolds
Source: Royal Society of Chemistry journal article supplement (doi:10.1039/d5bm00151j), 2025-01-01
Supplement: d5bm00151j2.xlsx [file d5bm00151j2.xlsx]

## Sheet: TA-Release 
Time (h)	P10PVA1-TA		P8PVA3-TA
0.5	2.10812	0.0259321	2.33643	0.459746
1	4.25922	1.0506	4.73405	0.497995
2	4.7744	0.95814	5.51953	0.377011
3	6.2488	1.61131	6.99205	0.257512
5	7.41766	1.77827	8.78489	0.443506
20	11.4374	2.62529	13.3774	0.095193
26	12.8014	2.53281	15.9912	0.247807
44	16.2012	2.67569	20.4073	0.284591
52	18.4789	2.73395	23.0155	0.523916
68	22.1808	4.00405	27.0212	0.240479
75	25.1094	4.75617	30.011	0.264565
92	29.4093	6.80466	37.4889	0.043911
100	32.8821	8.44349	40.4666	1.52433
164	42.3607	12.8863	49.8734	2.12463
188	46.4132	15.0474	53.9557	3.08744
213	49.1506	13.3248	56.6522	2.04481
261	59.5529	19.0481	64.3631	0.468414
309	58.3366	11.6082	65.5644	1.72757
335	61.3309	10.6601	65.2586	2.64408

## Sheet: TA-Release Zero order
Time (h)	P10PVA1-TA	P8PVA3-TA
0.5	2.10812	2.33643
1	4.25922	4.73405
2	4.7744	5.51953
3	6.2488	6.99205
5	7.41766	8.78489
20	11.4374	13.3774
26	12.8014	15.9912
44	16.2012	20.4073
52	18.4789	23.0155
68	22.1808	27.0212
75	25.1094	30.011
92	29.4093	37.4889
100	32.8821	40.4666
164	42.3607	49.8734
188	46.4132	53.9557
213	49.1506	56.6522
261	59.5529	64.3631

## Sheet: TA-Release Korsmeyer-peppas
Time (h)	P10PVA1-TA	P8PVA3-TA
0	0.62933	0.675233
0.30103	0.678919	0.741902
0.477121	0.795797	0.844605
0.69897	0.870267	0.943737
1.30103	1.05833	1.12637
1.41497	1.10726	1.20388
1.64345	1.20955	1.30979
1.716	1.26668	1.36202
1.83251	1.34598	1.4317
1.87506	1.39984	1.47728
1.96379	1.46848	1.5739
2	1.51696	1.6071
2.21484	1.62696	1.69787
2.27416	1.66664	1.73204
2.32838	1.69153	1.75322
2.41664	1.7749

## Sheet: TA-Release Higuchi
Time (h)	P10PVA1-TA	P8PVA3-TA
0.707107	2.10812	2.33643
1	4.25922	4.73405
1.41421	4.7744	5.51953
1.73205	6.2488	6.99205
2.23607	7.41766	8.78489
4.47214	11.4374	13.3774
5.09902	12.8014	15.9912
6.63325	16.2012	20.4073
7.2111	18.4789	23.0155
8.24621	22.1808	27.0212
8.66025	25.1094	30.011
9.59166	29.4093	37.4889
10	32.8821	40.4666
12.8062	42.3607	49.8734
13.7113	46.4132	53.9557
14.5945	49.1506	56.6522
16.1555	59.5529	64.3631

## Sheet: no. of compression cycles
Sample	No. of compression cycles
PEGDA10	0
PEGDA10	1
PEGDA10	0
PEGDA10	0
P8PVA3	11
P8PVA3	13
P8PVA3	14
P8PVA3	15
P8PVA3	17
P8PVA3-B	17
P8PVA3-B	20
P8PVA3-B	14
P8PVA3-B	23
P8PVA3-B	19
P8PVA3-TA	34
P8PVA3-TA	29
P8PVA3-TA	33
P8PVA3-TA	31
P8PVA3-TA	34

## Sheet: Compression
	Stress	Stress	Stress	Stress	Stress	Stress	Stress
Strain	Pa	Pa	Pa	Pa	Pa	Pa	Pa
%	P8PVA3-B	P10PVA1	P10PVA1-B	PEGDA10	P8PVA3	P8PVA3-TA	P10PVA1-TA
0	-45.393	-18.4102	9.69695	-2.95125	6.07128	624.128	689.293
0.000666667	-60.0087	-15.0373	14.1941	1.54589	6.67841	616.033	695.161
0.00233	-64.0842	-6.88624	15.74	5.62142	2.42851	614.818	701.03
0.005	-53.9657	0.42161	13.913	6.04303	-1.82138	621.901	703.257
0.00667	-38.3662	1.68643	10.1186	1.12428	-1.82138	632.425	701.435
0.00833	-30.6368	-3.65392	6.88624	-6.88624	1.21426	636.675	695.566
0.01	-35.8366	-10.2591	7.16731	-12.2266	4.85702	631.008	689.697
0.0117	-49.1874	-11.1023	11.6645	-9.97803	5.0594	620.89	689.293
0.0133	-60.4303	-5.34035	17.2859	-0.98375	2.83326	615.021	696.376
0.015	-61.133	2.67018	19.675	7.44838	-0.20238	617.449	706.292
0.0167	-51.0144	6.46464	18.2696	8.01053	-1.41663	625.949	711.352
0.0187	-36.6798	3.51339	16.021	0.56214	-0.8095	634.246	707.911
0.0203	-28.3882	-4.3566	16.1616	-8.85374	1.82138	635.865	697.792
0.022	-31.3394	-11.805	20.5182	-12.9293	4.85702	629.187	688.888
0.0237	-41.8796	-13.6319	27.9666	-8.43213	5.0594	619.27	687.673
0.0253	-51.1549	-8.85374	34.7123	1.68643	2.42851	613.806	693.542
0.027	-51.436	-1.68643	38.2257	10.5402	-1.41663	617.044	701.435
0.0287	-42.1607	1.9675	38.3662	12.0861	-2.63089	627.568	705.483
0.0303	-30.2152	-0.28107	37.9446	5.76196	-0.40475	636.27	703.257
0.032	-23.891	-6.18356	40.0526	-4.07553	2.83326	635.258	697.995
0.0337	-26.9828	-9.83749	44.1282	-9.97803	5.0594	624.937	695.161
0.0353	-36.1176	-7.30785	48.3442	-7.58892	4.04752	614.211	696.78
0.037	-42.8633	-0.14054	51.0144	0.84321	-0.20238	611.783	699.614
0.0387	-42.1607	6.3241	51.5765	7.58892	-5.26178	618.259	700.626
0.0403	-34.7123	6.88624	49.8901	7.44838	-6.88078	627.568	700.018
0.042	-25.1559	1.54589	48.6253	-0.14054	-3.03564	631.615	697.995
0.0437	-19.8155	-5.34035	50.1712	-9.83749	4.04752	628.782	697.185
0.0453	-22.9073	-7.72946	55.6521	-14.6157	9.30929	621.901	697.995
0.047	-33.3069	-3.935	63.8032	-9.41588	9.30929	618.259	701.435
0.0487	-43.0039	4.63767	72.3758	2.3891	4.04752	621.294	706.292
0.0503	-43.285	12.3671	78.4188	11.5239	-3.44039	628.377	709.53
0.052	-33.1664	13.4914	80.5269	10.5402	-8.29741	633.032	707.506
0.0537	-19.5344	7.16731	79.4026	1.12428	-5.8689	632.425	700.423
0.0553	-11.805	-2.3891	77.9972	-9.97803	1.82138	627.568	692.126
0.057	-13.6319	-8.15106	79.4026	-13.4914	8.70217	622.508	689.697
0.0587	-21.3614	-5.90249	83.8997	-6.60517	9.71405	619.675	695.161
0.0603	-29.2314	2.3891	89.9428	5.62142	5.46415	621.699	706.292
0.062	-31.761	10.8212	94.5805	13.0698	0.8095	629.187	713.982
0.0637	-26.8423	12.3671	94.5805	9.69695	-0.8095	637.889	712.971
0.0653	-18.1291	6.04303	91.3481	-1.26482	-0.40475	641.532	704.875
0.067	-11.6645	-3.65392	88.8185	-10.5402	-1.01188	637.484	696.78
0.0687	-10.6807	-9.83749	89.8022	-10.9618	-2.42851	628.175	694.15
0.0703	-14.6157	-6.46464	94.5805	-1.68643	-3.64277	620.08	697.185
0.072	-19.8155	5.19982	102.029	10.5402	-4.2499	620.08	703.054
0.0737	-20.9398	16.4427	109.196	16.8643	-4.2499	628.175	706.899
0.0753	-17.2859	18.6912	113.272	13.0698	-3.03564	638.496	704.673
0.077	-11.805	10.8212	113.553	2.67018	-0.40475	642.746	698.4
0.0787	-9.13481	-0.70268	113.272	-4.63767	2.22614	638.901	694.554
0.0803	-10.6807	-7.30785	115.801	-1.82696	3.44039	630.401	696.173
0.082	-13.913	-5.05928	120.579	8.71321	2.22614	622.508	702.042
0.0837	-15.74	3.79446	124.796	17.9886	-0.20238	619.675	708.518
0.0853	-14.0535	12.7887	127.606	18.2696	-2.02376	622.913	710.542
0.087	-9.83749	16.7237	127.606	8.71321	-1.41663	629.996	706.899
0.0887	-5.34035	13.4914	125.92	-4.07553	2.22614	637.484	700.626
0.0903	-3.935	6.04303	125.358	-11.3834	6.67841	640.925	697.388
0.092	-6.88624	-0.28107	129.574	-8.01053	8.09504	638.496	700.423
0.0937	-11.6645	-1.40536	138.709	3.09178	3.44039	631.615	708.114
0.0953	-14.6157	2.81071	149.108	13.7725	-4.2499	624.532	714.994
0.097	-13.2103	8.71321	155.151	16.4427	-9.51167	621.901	716.006
0.0987	-7.72946	11.6645	153.886	8.99428	-5.8689	626.556	712.161
0.1003	-1.26482	9.69695	146.86	-3.51339	3.23801	634.651	706.899
0.102	2.67018	3.935	140.536	-11.3834	10.9283	641.127	703.054
0.1037	1.26482	-0.98375	140.957	-8.71321	11.5354	641.734	703.054
0.1053	-3.23232	-1.68643	149.108	2.3891	4.85702	637.282	706.292
0.107	-5.76196	2.67018	159.648	13.0698	-3.64277	631.615	710.744
0.1087	-3.935	9.41588	165.972	15.0373	-8.29741	629.187	711.756
0.1103	0.56214	14.4752	165.972	7.16731	-5.0594	632.425	707.102
0.112	5.62142	14.4752	162.178	-4.63767	4.85702	638.496	699.614
0.1137	8.99428	10.3996	160.351	-10.9618	14.9758	640.925	694.554
0.1153	8.99428	5.76196	163.724	-6.60517	17.4043	635.258	696.376
0.117	6.3241	5.62142	171.453	5.34035	10.7259	625.949	704.673
0.1187	3.09178	10.5402	179.464	16.4427	-1.01188	622.913	714.994
0.1203	1.9675	16.8643	183.961	20.2371	-9.91642	631.615	719.851
0.122	2.81071	18.6912	183.961	15.5994	-8.49979	648.008	715.399
0.1237	4.63767	14.4752	181.01	6.3241	2.42851	658.734	705.887
0.1253	6.46464	6.88624	178.761	-1.40536	14.9758	655.091	700.626
0.127	8.01053	3.37285	179.886	-1.68643	18.821	639.508	703.864
0.1287	8.71321	7.44838	184.804	4.49714	12.3449	623.52	712.161
0.1303	8.99428	16.021	191.55	11.6645	0.60713	618.663	716.411
0.132	8.57267	23.0478	196.609	14.4752	-8.29741	627.568	713.78
0.1337	8.71321	23.0478	198.436	10.3996	-9.91642	642.139	706.899
0.1353	10.8212	16.021	198.015	2.3891	-4.04752	651.246	701.638
0.137	13.3509	6.74571	198.155	-2.95125	4.04752	648.008	702.245
0.1387	15.0373	2.24857	201.106	-0.28107	8.09504	635.663	709.125
0.1403	16.4427	5.62142	206.166	8.99428	5.66653	623.318	717.22
0.142	17.2859	14.4752	210.382	16.8643	0.20238	620.08	719.649
0.1437	16.7237	23.1884	210.803	17.848	-4.2499	628.175	713.78
0.1453	16.4427	26.7018	207.29	12.6482	-4.04752	641.532	703.257
0.147	18.2696	22.0641	203.777	6.46464	1.21426	652.258	695.769
0.1487	22.0641	12.7887	204.76	4.63767	6.47603	652.662	697.388
0.1503	25.4369	5.62142	211.084	8.71321	5.66653	643.151	706.899
0.152	25.4369	6.46464	220.641	14.1941	-0.40475	631.615	718.232
0.1537	21.9235	15.3184	229.916	15.3184	-5.8689	627.77	723.494
0.1553	16.8643	24.5937	234.132	9.27535	-5.8689	633.639	719.244
0.157	15.0373	27.1234	232.867	0.56214	0.8095	645.175	708.923
0.1587	18.9723	20.9398	229.635	-4.3566	9.10692	652.662	699.614
0.1603	25.2964	10.9618	229.354	-2.10803	12.9521	649.222	699.007
0.162	30.0746	5.19982	233.992	6.3241	9.30929	636.675	707.506
0.1637	30.4962	7.86999	241.018	14.6157	0.60713	623.925	719.851
0.1653	28.2477	16.8643	245.937	17.4264	-6.67841	622.913	728.756
0.167	25.0153	25.2964	247.062	13.913	-7.28554	635.258	728.149
0.1687	24.1721	26.7018	246.218	6.88624	-0.20238	651.651	718.839
0.1703	26.8423	20.0966	245.094	0.56214	9.10692	658.734	708.518
0.172	31.6205	11.5239	245.656	-1.68643	12.9521	651.651	704.875
0.1737	34.9933	6.88624	248.607	1.54589	8.29741	636.675	709.732
0.1753	34.9933	10.3996	253.105	8.57267	-0.8095	624.532	718.839
0.177	32.0421	19.3939	257.883	15.3184	-8.29741	623.318	725.518
0.1787	27.545	27.2639	260.412	17.1453	-8.49979	632.02	725.518
0.1803	24.5937	28.3882	259.991	13.7725	-1.01188	643.353	719.851
0.182	25.718	21.9235	259.007	7.58892	9.30929	650.032	713.375
0.1837	30.7773	12.6482	260.693	3.935	15.1782	647.401	712.768
0.1853	36.5393	7.58892	265.191	5.34035	11.5354	638.294	719.244
0.187	40.0526	10.8212	270.531	10.8212	2.42851	629.996	727.744
0.1887	38.3662	20.0966	274.466	16.021	-5.66653	628.377	729.97
0.1903	33.8691	28.6693	276.012	16.1616	-5.8689	634.044	723.089
0.192	31.1989	30.4962	275.309	11.9455	0.8095	640.52	712.768
0.1937	32.7448	24.1721	274.888	6.46464	9.91642	642.746	707.911
0.1953	37.1014	13.4914	276.996	3.935	13.9639	640.52	713.78
0.197	40.8958	5.76196	282.195	5.76196	9.30929	637.889	726.53
0.1987	41.7391	6.3241	289.222	11.2429	-0.40475	637.484	736.446
0.2003	40.0526	14.4752	294.422	17.1453	-8.90454	640.115	736.851
0.202	36.5393	24.5937	295.546	19.1128	-11.5354	643.151	728.149
0.2037	34.7123	30.7773	293.86	16.021	-6.88078	643.758	716.006
0.2053	35.696	29.7935	292.595	10.9618	1.61901	640.925	709.53
0.207	39.35	22.7668	293.017	8.2916	8.09504	635.865	711.756
0.2087	44.5498	14.8968	295.546	9.69695	9.30929	633.032	720.863
0.2103	49.4685	12.6482	300.043	14.1941	5.66653	634.246	728.149
0.212	51.5765	18.5507	305.243	18.5507	1.21426	639.306	727.137
0.2137	49.8901	27.545	309.038	20.2371	-1.82138	645.377	718.232
0.2153	46.3767	32.3232	310.443	18.5507	-1.41663	650.234	709.125
0.217	43.566	30.2152	309.74	14.4752	0.8095	650.639	707.911
0.2187	43.8471	23.7505	308.195	10.9618	3.84514	645.782	715.399
0.2203	46.9389	17.5669	307.773	10.8212	5.0594	638.294	724.708
0.222	50.5928	15.3184	309.459	13.7725	5.46415	633.639	729.363
0.2237	52.4198	18.5507	314.94	17.4264	5.0594	635.663	726.125
0.2253	51.5765	24.1721	323.513	18.5507	5.46415	644.365	717.625
0.227	48.6253	27.826	332.086	16.021	6.07128	652.662	710.137
0.2287	46.3767	26.1396	337.426	12.0861	4.85702	653.877	709.732
0.2303	46.9389	21.2209	336.442	10.1186	0.8095	647.401	718.232
0.232	51.2955	18.2696	331.664	11.2429	-3.03564	638.294	730.375
0.2337	55.371	20.0966	328.151	14.6157	-1.41663	633.639	736.851
0.2353	56.2142	24.8748	329.837	18.5507	4.04752	636.675	732.601
0.237	53.8251	29.7935	336.723	20.7993	9.71405	643.353	720.256
0.2387	50.5928	32.0421	344.593	19.8155	10.7259	648.615	707.911
0.2403	50.1712	29.3719	349.371	17.1453	5.66653	649.222	706.292
0.242	53.4035	24.3127	348.247	15.0373	-2.42851	646.389	716.613
0.2437	58.0412	21.6425	343.75	15.5994	-7.69029	642.139	730.375
0.2453	61.5546	24.8748	340.237	18.2696	-5.0594	639.306	736.446
0.247	61.2735	32.3232	342.626	20.9398	3.23801	640.115	730.375
0.2487	58.6033	39.35	350.074	21.9235	11.3331	645.175	717.22
0.2503	56.4953	40.4742	358.647	20.7993	12.9521	649.627	707.911
0.252	57.9006	34.2907	363.847	18.5507	8.09504	648.615	708.114
0.2537	62.3978	24.8748	365.252	17.848	1.61901	642.544	717.625
0.2553	66.8949	18.5507	364.69	19.675	-2.63089	635.258	729.97
0.257	69.1435	19.3939	365.674	23.1884	-3.03564	632.627	737.256
0.2587	68.4408	26.4207	368.625	25.718	0.8095	636.877	734.22
0.2603	65.349	34.1501	372.279	24.3127	7.69029	644.77	723.899
0.262	62.1167	36.5393	375.792	18.5507	12.5473	650.841	713.982
0.2637	61.5546	31.3394	379.165	11.9455	12.5473	650.841	712.363
0.2653	64.2248	21.6425	381.554	8.71321	6.67841	645.175	718.637
0.267	68.4408	15.5994	381.976	10.1186	-0.20238	638.901	727.137
0.2687	70.9705	18.6912	382.678	14.8968	-3.03564	637.889	731.994
0.2703	70.1273	29.5125	384.365	19.3939	-0.40475	642.746	730.982
0.272	66.7544	39.35	387.176	21.2209	3.23801	648.615	727.137
0.2737	63.9437	40.0526	389.705	19.1128	4.85702	651.651	724.101
0.2753	64.3653	31.1989	392.375	15.3184	4.45227	649.222	724.506
0.277	68.3003	20.2371	394.624	12.6482	4.04752	643.758	726.53
0.2787	73.0785	16.1616	395.748	12.3671	5.0594	638.294	728.149
0.2803	76.1703	22.0641	396.451	15.3184	6.47603	636.675	728.149
0.282	76.873	33.4475	398.418	19.675	6.67841	641.127	725.518
0.2837	75.3271	41.5985	402.775	23.1884	4.45227	648.008	721.875
0.2853	73.219	41.5985	408.818	24.1721	0.8095	651.246	719.244
0.287	73.9217	33.588	414.72	21.502	-1.01188	647.603	722.28
0.2887	78.2783	23.7505	417.672	16.4427	0.8095	640.52	729.97
0.2903	83.8997	19.675	417.672	13.0698	6.67841	637.484	738.065
0.292	86.5699	24.8748	416.407	13.7725	11.9402	641.532	740.089
0.2937	84.7429	35.415	416.407	17.5669	11.3331	649.222	734.827
0.2953	80.2458	43.0039	419.077	22.3452	4.85702	653.877	726.732
0.297	78.4188	42.3012	422.872	23.891	-1.01188	650.841	722.482
0.2987	80.9485	34.1501	425.682	21.9235	-2.42851	642.746	726.125
0.3003	84.7429	25.0153	427.228	17.9886	1.82138	635.865	734.625
0.302	86.5699	22.0641	428.071	15.3184	7.69029	636.27	740.494
0.3037	86.4294	27.1234	429.758	15.0373	10.7259	643.758	738.875
0.3053	85.024	35.415	432.006	16.7237	9.30929	652.662	730.982
0.307	83.8997	41.1769	434.676	19.1128	4.85702	655.091	722.28
0.3087	82.916	39.4905	436.925	19.8155	0.60713	650.639	718.839
0.3103	82.4944	32.4637	438.471	18.5507	-1.01188	643.151	723.899
0.312	82.4944	26.4207	439.033	17.9886	2.22614	640.52	733.208
0.3137	84.3213	26.7018	439.033	20.0966	8.29741	645.377	739.886
0.3153	88.3969	33.588	440.72	23.4694	13.9639	652.865	739.077
0.317	92.3318	41.5985	445.357	25.9991	13.3568	656.508	734.018
0.3187	91.7698	44.2687	451.681	26.1396	5.66653	655.091	727.744
0.3203	87.6942	39.4905	458.005	24.5937	-2.42851	650.234	723.089
0.322	83.8997	31.3394	461.659	22.7668	-5.26178	644.77	723.494
0.3237	84.1808	25.9991	461.659	21.6425	-0.8095	642.544	728.351
0.3253	88.678	27.826	459.551	20.7993	7.48791	646.389	735.232
0.327	94.721	35.9771	458.849	20.9398	12.3449	654.484	739.482
0.3287	97.2506	43.8471	461.8	22.7668	10.3212	659.746	739.482
0.3303	93.5966	45.8146	468.405	24.8748	3.23801	657.115	736.244
0.332	86.1483	40.8958	475.151	24.8748	-4.65465	646.996	732.601
0.3337	81.2296	33.0258	479.507	22.0641	-7.28554	637.282	730.982
0.3353	82.7755	27.826	479.648	18.5507	-4.04752	635.663	732.399
0.337	90.2239	28.9503	477.259	17.5669	2.83326	643.758	735.637
0.3387	98.7965	35.2744	475.01	21.6425	8.70217	654.484	739.077
0.3403	103.575	41.7391	476.837	28.2477	9.10692	658.734	740.089
0.342	102.731	44.1282	482.599	32.4637	4.04752	652.865	738.065
0.3437	96.9695	41.3175	489.626	30.9178	-1.41663	641.734	735.637
0.3453	90.9265	36.5393	494.404	24.8748	-3.44039	634.651	735.232
0.347	89.0996	33.8691	495.388	18.9723	-1.01188	637.282	737.256
0.3487	93.4561	35.9771	492.858	17.848	2.22614	646.996	739.077
0.3503	100.905	41.5985	489.907	22.0641	3.44039	656.508	739.077
0.352	106.104	46.3767	490.329	28.9503	3.23801	658.531	737.256
0.3537	105.823	46.7983	495.388	33.8691	2.22614	652.258	735.232
0.3553	100.342	43.4255	501.853	33.8691	0.8095	643.151	734.827
0.357	94.0183	38.2257	506.35	28.3882	0.8095	638.496	737.863
0.3587	92.3318	34.1501	507.614	21.502	2.22614	641.734	742.315
0.3603	97.2506	34.9933	505.928	18.5507	3.84514	649.02	745.958
0.362	106.104	40.4742	504.663	21.6425	3.84514	653.877	745.755
0.3637	113.834	46.5173	506.209	27.826	2.22614	652.662	740.696
0.3653	114.958	47.9226	510.987	30.7773	-0.40475	647.401	733.613
0.367	109.196	43.1444	516.609	27.9666	-2.42851	643.151	729.97
0.3687	101.607	36.5393	521.106	22.7668	-0.8095	643.151	732.601
0.3703	97.6722	32.7448	523.636	20.2371	3.44039	646.996	737.863
0.372	100.202	34.1501	523.636	22.6262	6.47603	650.841	742.315
0.3737	106.526	39.4905	522.511	27.826	5.0594	651.651	743.934
0.3753	111.726	45.6741	522.652	32.3232	0.8095	650.234	742.113
0.377	111.726	48.2037	526.165	32.7448	-3.44039	650.639	737.863
0.3787	106.948	44.9714	531.505	29.0909	-4.2499	653.472	735.232
0.3803	101.748	38.6473	536.705	24.3127	-0.8095	656.71	735.839
0.382	100.905	33.8691	539.516	21.6425	6.47603	656.508	740.494
0.3837	106.104	34.9933	539.516	23.0478	12.5473	652.865	744.744
0.3853	113.553	40.8958	538.813	27.2639	13.5592	649.02	744.744
0.387	117.347	47.2199	540.781	30.4962	7.69029	647.401	740.696
0.3887	115.38	49.328	546.402	30.2152	-1.82138	648.413	735.839
0.3903	110.32	46.3767	551.883	27.826	-7.89266	650.639	734.22
0.392	107.931	41.7391	554.132	25.718	-6.67841	653.877	739.482
0.3937	110.32	40.0526	554.132	25.2964	0.8095	655.901	748.589
0.3953	116.644	41.5985	554.132	26.4207	9.10692	653.877	754.458
0.397	121.844	45.393	555.115	28.3882	10.9283	647.603	751.827
0.3987	121.704	48.7658	555.959	29.5125	4.04752	641.532	742.72
0.4003	116.504	48.7658	557.505	28.6693	-6.27365	640.52	734.625
0.402	111.023	45.393	560.315	25.9991	-12.1426	645.175	734.22
0.4037	109.196	40.8958	564.531	23.891	-8.90454	651.853	741.708
0.4053	112.007	39.4905	569.731	24.3127	1.61901	657.722	749.803
0.407	116.926	43.0039	574.509	27.2639	12.9521	659.341	752.839
0.4087	120.72	49.0469	577.32	30.2152	18.2138	656.71	749.196
0.4103	121.844	52.8414	577.742	30.9178	15.1782	652.865	741.506
0.412	119.877	50.1712	577.32	29.7935	8.09504	650.841	734.827
0.4137	116.644	42.7228	577.32	28.9503	1.61901	650.841	734.625
0.4153	115.38	36.1176	579.006	30.2152	-1.01188	650.841	742.113
0.417	117.769	35.9771	583.363	32.4637	-0.8095	650.032	751.22
0.4187	123.109	43.0039	588.844	33.1664	0.20238	649.627	754.862
0.4203	126.904	52.4198	592.638	31.6205	1.21426	651.651	751.22
0.422	126.623	58.0412	593.482	28.9503	1.82138	655.091	744.339
0.4237	123.109	55.6521	593.763	27.2639	1.61901	659.139	741.101
0.4253	119.596	46.3767	595.309	27.545	0.20238	660.353	743.732
0.427	119.877	37.1014	598.682	28.9503	-1.41663	657.722	749.803
0.4287	123.109	34.5718	602.616	29.3719	-2.42851	652.865	753.851
0.4303	127.606	40.0526	606.27	28.3882	-2.63089	650.032	752.434
0.432	131.26	49.0469	607.535	27.545	-3.03564	651.651	746.565
0.4337	132.525	55.6521	606.27	27.826	-4.04752	656.508	741.101
0.4353	131.26	55.6521	604.865	29.0909	-4.04752	658.127	738.875
0.437	128.028	49.328	607.114	30.7773	-1.41663	653.472	741.101
0.4387	125.92	41.3175	612.735	31.3394	2.42851	645.782	745.755
0.4403	127.185	39.0689	620.043	30.2152	5.66653	640.925	749.601
0.442	131.26	45.2525	625.524	27.545	6.67841	642.544	750.815
0.4437	134.774	55.371	626.367	25.4369	5.0594	646.794	748.589
0.4453	135.757	60.9924	623.135	26.7018	1.82138	649.02	744.339
0.447	134.071	58.0412	618.919	31.1989	-1.41663	647.603	742.315
0.4487	131.682	49.8901	617.513	35.2744	-1.01188	646.794	744.339
0.4503	130.698	43.566	622.01	35.415	3.44039	648.615	749.196
0.452	132.525	43.4255	631.145	32.3232	8.09504	652.662	753.243
0.4537	135.476	49.7496	639.999	28.9503	7.48791	657.519	752.231
0.4553	137.725	57.9006	643.372	27.826	2.42851	660.15	745.958
0.457	138.146	62.1167	640.842	29.5125	-2.42851	657.519	739.077
0.4587	136.882	59.4465	636.767	33.1664	-4.04752	650.032	737.256
0.4603	135.055	51.2955	636.345	35.9771	-1.82138	643.151	742.72
0.462	134.352	43.1444	641.685	34.8528	3.44039	642.544	753.446
0.4637	135.476	41.7391	650.539	30.7773	7.48791	646.996	762.35
0.4653	137.022	48.2037	657.425	26.8423	5.66653	653.27	762.35
0.467	138.709	57.6196	658.69	25.718	-0.40475	657.519	753.243
0.4687	138.428	61.9762	655.317	27.9666	-5.26178	658.734	741.101
0.4703	135.195	57.198	651.242	31.1989	-5.0594	657.519	734.625
0.472	130.979	47.0794	650.118	33.0258	0.20238	655.496	739.077
0.4737	130.558	40.1932	653.771	32.4637	5.0594	653.877	752.231
0.4753	136.179	42.4417	660.377	31.3394	6.07128	652.865	762.35
0.477	146.157	52.4198	666.42	30.2152	1.61901	652.865	760.327
0.4787	156.697	62.8194	668.949	30.9178	-5.26178	654.282	748.993
0.4803	162.459	66.0517	667.966	33.588	-9.91642	656.508	738.47
0.482	159.086	59.7276	666.42	36.3987	-9.91642	657.519	737.863
0.4837	148.124	49.0469	667.544	37.523	-6.88078	656.71	749.803
0.4853	137.584	41.7391	671.901	36.3987	-3.44039	655.901	768.219
0.487	134.352	43.566	677.241	34.2907	-0.8095	655.091	779.147
0.4887	140.536	53.8251	681.316	33.0258	-0.8095	654.889	774.29
0.4903	150.373	65.068	683.003	33.588	-2.42851	653.877	756.684
0.492	155.854	68.0192	682.441	36.5393	-4.65465	652.662	740.696
0.4937	153.324	59.7276	681.738	39.7716	-5.26178	651.651	737.863
0.4953	146.298	47.6416	683.565	39.4905	-3.44039	651.853	748.589
0.497	140.536	41.1769	689.046	34.8528	-0.40475	654.484	764.172
0.4987	139.973	44.2687	696.354	27.9666	0.8095	658.531	772.064
0.5003	145.454	53.9657	701.694	24.3127	-0.40475	661.769	765.184
0.502	153.324	63.1005	702.818	25.9991	-2.02376	662.377	749.803
0.5037	158.384	64.6464	699.727	31.1989	-1.82138	659.746	739.482
0.5053	157.962	58.3222	695.089	35.9771	0.60713	655.496	742.315
0.507	153.184	49.8901	692.84	37.2419	2.83326	651.651	755.672
0.5087	148.406	47.0794	695.792	34.5718	2.42851	650.639	768.422
0.5103	147.422	51.0144	703.24	30.7773	-0.8095	653.27	770.041
0.512	151.076	59.0249	710.829	30.0746	-4.04752	658.734	759.315
0.5137	156.276	65.068	713.78	33.588	-4.04752	664.4	744.339
0.5153	159.227	65.349	712.515	38.6473	-0.40475	666.626	738.47
0.517	158.805	60.1492	710.548	40.0526	4.85702	665.21	745.755
0.5187	157.4	52.8414	711.391	36.3987	8.09504	661.365	759.922
0.5203	157.259	48.7658	716.169	30.4962	6.67841	657.519	769.231
0.5217	159.227	51.2955	722.774	27.1234	2.22614	655.091	765.588
0.5237	162.459	58.7439	728.255	28.9503	-3.44039	656.103	752.839
0.5253	164.427	64.6464	730.223	34.8528	-4.65465	658.734	741.708
0.527	164.005	64.6464	729.38	40.8958	-0.40475	661.365	742.72
0.5287	161.756	59.8681	727.693	43.0039	6.07128	662.984	755.47
0.5303	160.211	54.2467	728.677	38.3662	9.10692	662.377	771.052
0.532	159.929	51.5765	732.752	31.3394	5.0594	659.746	778.54
0.5337	160.211	53.9657	738.093	27.826	-2.63089	658.531	773.683
0.5353	159.929	60.5708	742.028	30.7773	-8.29741	659.139	759.719
0.537	159.086	66.4733	743.574	37.9446	-7.28554	658.734	746.363
0.5387	157.962	67.176	743.433	44.5498	-1.01188	657.519	742.72
0.5403	158.102	62.3978	743.433	46.7983	4.85702	657.722	750.613
0.542	160.773	56.7764	744.557	43.566	7.48791	660.15	764.172
0.5437	165.551	54.2467	746.244	37.1014	7.08316	662.377	774.29
0.5453	170.048	56.3548	748.773	30.2152	6.07128	663.996	775.909
0.547	172.859	61.2735	751.725	28.3882	3.84514	664.4	768.422
0.5487	172.859	65.6301	753.271	33.8691	1.61901	661.365	756.684
0.5503	171.032	65.349	753.271	43.0039	1.61901	656.103	748.993
0.552	170.048	60.5708	753.13	48.6253	4.04752	652.662	751.827
0.5537	171.734	54.6683	755.379	46.3767	7.48791	654.282	763.969
0.5553	174.405	52.4198	761.703	38.3662	8.09504	660.758	774.695
0.557	175.81	55.0899	769.432	30.2152	3.44039	667.638	775.302
0.5587	174.405	61.5546	774.351	26.8423	-5.26178	669.257	766.6
0.5603	171.453	66.8949	773.648	29.7935	-13.5592	665.21	757.088
0.562	169.205	66.8949	769.151	37.2419	-14.7735	657.722	755.672
0.5637	169.205	61.5546	765.076	43.4255	-6.88078	652.258	764.172
0.5653	170.61	54.9494	765.076	43.566	4.45227	652.258	775.302
0.567	172.859	52.4198	769.432	37.6635	10.9283	656.71	778.945
0.5687	174.405	56.3548	775.756	31.3394	8.70217	662.377	771.052
0.5703	173.702	64.2248	781.659	30.4962	1.61901	665.615	757.088
0.572	171.734	70.8299	784.329	34.5718	-5.0594	665.21	747.374
0.5737	170.751	70.8299	783.205	39.35	-6.67841	662.377	750.815
0.5753	172.437	63.8032	778.005	40.4742	-4.2499	658.734	766.195
0.577	174.124	54.9494	760.578	37.6635	-0.20238	657.519	781.576
0.5787	174.686	49.8901	712.796	33.0258	3.44039	659.746	784.409
0.5803	175.81	53.1224	632.972	30.4962	4.85702	663.591	773.076
0.582	180.588	63.5221	552.164	33.0258	2.83326	666.829	758.1
0.5837	185.507	74.3433	503.539	39.4905	-0.40475	667.841	750.613
0.5853	185.085	78.2783	486.534	46.3767	-2.02376	666.829	755.47
0.587	179.183	71.3921	482.178	48.6253	-2.02376	664.4	768.219
0.5887	174.124	59.4465	479.648	44.1282	-1.82138	661.365	780.159
0.5903	175.107	52.4198	477.399	34.9933	-1.01188	659.746	783.397
0.592	180.307	55.6521	475.853	27.2639	-0.40475	660.96	774.088
0.5937	185.788	65.349	476.134	27.2639	0.20238	663.996	756.481
0.5953	189.161	73.5001	477.961	34.9933	0.20238	665.615	741.506
0.597	189.582	74.6244	479.648	44.9714	0.20238	665.615	740.494
0.5987	187.053	69.1435	480.351	49.7496	1.21426	665.21	756.077
0.6003	182.977	61.2735	479.226	46.0957	2.42851	666.222	779.957
0.602	179.604	56.3548	476.275	37.523	3.23801	666.222	796.147
0.6037	178.199	57.198	474.308	30.0746	1.82138	664.4	793.314
0.6053	180.026	63.1005	476.134	29.0909	-1.01188	661.972	774.088
0.607	184.804	70.1273	482.037	35.696	-2.42851	662.377	753.243
0.6087	190.707	73.7812	487.658	44.6903	1.21426	666.222	746.565
0.6103	195.063	71.6731	488.08	49.4685	7.69029	671.483	757.088
0.612	196.609	65.349	482.88	46.3767	11.9402	675.329	774.088
0.6137	195.063	60.8519	476.978	37.9446	9.71405	675.126	784.814
0.6153	190.988	62.6789	475.01	31.3394	2.83326	669.257	782.79
0.617	187.334	69.1435	478.524	33.0258	-2.42851	661.365	771.66
0.6187	187.053	74.3433	485.129	41.3175	-2.02376	657.722	760.731
0.6203	190.426	73.9217	489.204	49.4685	3.23801	662.579	758.708
0.622	194.501	68.7219	481.756	50.5928	9.30929	673.507	767.207
0.6237	195.625	63.8032	451.26	44.1282	10.7259	682.614	779.552
0.6253	193.939	62.6789	399.121	34.9933	5.0594	682.614	786.028
0.627	192.112	66.1923	349.09	30.7773	-5.0594	674.114	783.195
0.6287	192.534	72.0947	323.794	34.1501	-11.7378	661.972	774.29
0.6303	194.782	75.3271	320.562	43.0039	-10.5236	654.484	765.588
0.632	198.015	72.7974	325.199	51.2955	-1.01188	656.71	763.969
0.6337	201.106	66.7544	327.87	53.1224	9.91642	667.234	771.457
0.6353	202.231	61.9762	326.043	46.7983	14.9758	676.341	781.778
0.637	199.279	63.5221	321.545	36.1176	10.7259	676.341	785.826
0.6387	193.377	70.5489	317.891	28.3882	-0.20238	668.448	780.159
0.6403	189.161	77.5756	318.594	28.6693	-11.5354	662.579	770.041
0.642	189.864	78.4188	324.075	37.1014	-15.3806	663.388	762.957
0.6437	195.907	72.0947	330.399	47.501	-8.49979	668.853	763.565
0.6453	203.636	62.8194	333.491	52.2792	4.45227	674.114	771.66
0.647	208.836	57.9006	332.086	47.6416	14.9758	674.114	780.767
0.6487	208.414	60.8519	328.572	37.2419	17.202	668.448	785.826
0.6503	202.512	69.003	327.167	28.9503	12.5473	661.769	784.207
0.652	196.328	76.4513	329.837	29.7935	5.46415	660.15	777.326
0.6537	194.782	78.4188	335.037	38.9284	-1.01188	664.603	768.422
0.6553	198.858	74.9055	339.393	48.3442	-3.64277	671.888	764.172
0.657	206.587	69.003	339.674	50.1712	-1.82138	676.341	767.207
0.6587	211.506	65.349	335.318	43.566	2.83326	675.329	774.29
0.6603	210.803	66.7544	330.54	33.588	6.07128	669.46	780.159
0.662	206.166	72.3758	330.399	28.2477	7.69029	662.984	780.564
0.6637	201.528	79.1215	335.037	30.7773	9.30929	661.769	776.314
0.6653	200.263	83.0565	342.345	38.2257	10.9283	667.234	772.469
0.667	202.933	80.1053	347.544	44.2687	10.7259	674.721	772.064
0.6687	208.414	72.6569	348.669	43.4255	8.70217	676.745	774.898
0.6703	213.052	65.349	345.577	36.3987	5.0594	670.472	777.326
0.672	214.457	63.8032	341.642	28.9503	1.61901	660.758	776.314
0.6737	213.052	68.3003	340.799	27.9666	0.8095	655.091	771.457
0.6753	211.084	76.1703	343.75	35.9771	4.45227	658.531	767.207
0.677	210.241	81.3701	347.123	47.0794	9.71405	666.829	767.41
0.6787	211.506	79.1215	348.388	52.8414	12.3449	672.495	773.279
0.6803	213.614	70.5489	348.388	49.328	10.7259	671.888	780.564
0.682	214.317	63.1005	348.669	39.0689	6.07128	667.841	783.195
0.6837	213.052	63.1005	350.074	29.5125	0.8095	666.019	779.147
0.6853	212.911	70.8299	352.744	26.8423	-1.82138	666.829	772.064
0.687	214.738	80.5269	355.695	32.7448	0.60713	670.067	764.981
0.6887	217.69	85.3051	357.663	42.4417	5.46415	672.698	762.553
0.6903	219.517	81.2296	358.366	49.0469	9.10692	672.495	768.422
0.692	218.252	71.6731	358.225	48.3442	9.10692	669.257	779.147
0.6937	214.457	64.2248	358.225	41.7391	6.67841	666.019	787.445
0.6953	211.366	65.068	358.928	34.2907	4.85702	666.222	789.064
0.697	212.911	73.5001	359.49	30.7773	4.04752	668.853	782.79
0.6987	218.252	83.0565	360.052	33.8691	4.85702	669.864	771.66
0.7003	222.608	86.851	361.176	42.3012	4.85702	667.841	760.934
0.702	223.03	82.4944	363.003	49.4685	4.04752	664.603	757.493
0.7037	220.079	73.9217	363.566	49.7496	2.83326	664.603	765.184
0.7053	217.127	68.5814	362.301	43.1444	2.42851	668.853	780.564
0.707	216.565	69.003	360.614	34.5718	3.84514	675.329	791.29
0.7087	218.533	73.5001	362.02	31.3394	5.46415	679.376	787.445
0.7103	221.484	78.4188	366.376	36.8203	6.47603	678.567	770.445
0.712	223.592	80.5269	372.841	48.2037	5.46415	674.114	755.065
0.7137	224.154	78.4188	379.024	56.7764	3.84514	668.853	756.481
0.7153	224.014	73.7812	380.992	55.371	3.23801	666.626	776.314
0.717	224.014	70.5489	377.9	45.8146	5.46415	669.257	798.373
0.7187	224.435	71.3921	371.576	36.1176	8.70217	674.317	804.647
0.7203	226.262	75.3271	367.219	33.1664	9.30929	677.352	788.659
0.722	228.23	78.981	368.344	38.6473	6.07128	675.126	761.946
0.7237	229.916	80.1053	374.949	48.3442	1.82138	669.46	744.339
0.7253	229.635	77.9972	383.522	55.0899	-0.40475	666.222	749.196
0.727	227.808	74.2028	389.424	53.544	1.21426	668.246	773.076
0.7287	225.56	71.6731	389.846	44.9714	6.07128	674.317	796.754
0.7303	224.435	73.5001	385.77	36.1176	11.3331	678.567	801.814
0.732	225.279	78.981	380.149	34.1501	12.3449	676.948	784.814
0.7337	227.668	84.1808	377.479	40.0526	7.69029	670.472	759.719
0.7353	230.478	85.3051	379.727	49.0469	-1.41663	666.019	746.565
0.737	232.165	81.9322	386.473	55.371	-9.51167	668.448	755.065
0.7387	232.305	76.5919	393.5	54.6683	-11.5354	675.126	778.54
0.7403	231.884	73.0785	397.153	47.6416	-5.26178	679.983	800.195
0.742	231.603	73.219	395.045	38.9284	6.47603	679.578	805.254
0.7437	231.041	77.154	389.846	34.2907	18.4162	675.936	792.504
0.7453	230.478	81.9322	385.77	38.2257	22.4637	671.888	773.279
0.747	231.181	84.6024	386.473	48.2037	14.5711	669.257	761.338
0.7487	233.008	83.8997	392.516	57.4791	-0.8095	668.448	761.338
0.7503	235.116	81.2296	400.948	57.9006	-12.5473	669.257	771.052
0.752	237.365	79.1215	406.148	47.501	-11.1307	670.067	782.588
0.7537	238.208	79.1215	405.726	33.4475	1.61901	672.091	788.052
0.7553	237.365	81.2296	400.948	26.7018	15.1782	675.126	785.016
0.757	235.116	83.6187	396.591	32.7448	19.2257	677.959	777.528
0.7587	234.132	84.6024	396.591	47.6416	11.5354	678.971	773.076
0.7603	236.662	84.1808	401.651	60.1492	-0.40475	677.959	775.707
0.762	241.581	83.0565	407.975	61.6951	-8.29741	676.745	782.79
0.7637	245.656	81.2296	410.645	52.4198	-7.89266	675.329	788.052
0.7653	246.218	80.1053	407.694	39.4905	-1.41663	674.317	784.814
0.767	242.283	80.5269	403.056	32.0421	4.04752	674.317	774.898
0.7687	238.067	82.4944	401.229	35.2744	3.84514	675.733	766.195
0.7703	235.678	86.0078	404.742	47.0794	-0.40475	676.948	765.791
0.772	236.662	88.3969	411.629	59.0249	-2.02376	677.757	776.314
0.7737	240.456	88.2563	417.672	63.1005	1.21426	676.948	791.29
0.7753	245.235	85.024	418.796	56.4953	7.08316	675.733	799.385
0.777	248.467	82.7755	413.877	44.5498	9.91642	673.103	794.326
0.7787	248.889	84.3213	406.85	36.5393	7.48791	672.698	780.159
0.7803	247.343	87.5537	404.742	39.0689	0.20238	676.745	768.826
0.782	245.516	89.8022	411.207	49.8901	-7.69029	681.805	769.838
0.7837	245.094	89.3806	421.045	60.1492	-11.7378	683.626	781.576
0.7853	246.359	84.7429	428.071	60.9924	-9.51167	679.376	794.326
0.787	248.889	78.4188	427.369	51.7171	-0.20238	672.495	798.778
0.7887	251.137	75.3271	420.623	40.0526	11.5354	667.638	791.29
0.7903	251.84	78.4188	413.877	34.2907	18.821	668.246	777.933
0.792	251.418	86.1483	413.596	39.0689	17.4043	672.698	768.422
0.7937	250.294	93.1751	421.326	49.8901	9.71405	676.948	770.445
0.7953	249.591	95.002	432.568	58.7439	-0.8095	676.745	782.183
0.797	250.294	90.2239	440.157	58.3222	-8.49979	672.698	795.54
0.7987	251.418	81.3701	439.174	48.7658	-9.91642	669.864	801.409
0.8003	251.84	74.3433	431.444	37.6635	-2.42851	671.079	796.552
0.802	251.84	74.6244	423.996	33.588	9.71405	675.936	785.016
0.8037	252.261	81.6512	423.293	40.0526	18.4162	680.995	775.302
0.8053	253.667	90.0833	429.898	52.4198	17.202	681.602	773.076
0.807	256.618	94.2994	438.471	62.1167	7.08316	676.948	778.338
0.8087	260.412	91.6292	443.53	62.1167	-4.2499	669.46	787.445
0.8103	262.661	84.3213	441.984	52.4198	-8.49979	665.615	794.528
0.812	261.115	77.8567	437.206	40.1932	-3.64277	669.257	796.147
0.8137	257.18	76.5919	433.833	35.696	6.47603	677.757	792.504
0.8153	253.386	81.6512	434.958	41.7391	13.9639	683.828	788.052
0.817	252.542	89.0996	439.174	53.1224	13.9639	683.221	785.826
0.8187	256.618	93.1751	443.952	60.8519	7.69029	676.948	786.433
0.8203	263.083	90.9265	446.903	58.7439	-1.01188	669.46	788.457
0.822	267.158	84.6024	447.606	49.328	-7.69029	666.019	790.683
0.8237	266.315	80.1053	446.622	40.0526	-6.88078	669.46	793.516
0.8253	261.818	80.6674	445.779	37.9446	0.8095	678.364	795.945
0.827	257.18	85.7267	446.06	44.2687	11.3331	684.436	795.135
0.8287	256.758	90.9265	447.606	53.4035	17.4043	683.221	792.504
0.8303	259.991	91.7698	449.152	59.7276	15.583	675.329	790.278
0.832	263.364	87.2726	450.979	59.0249	6.47603	669.257	789.671
0.8337	264.769	81.6512	452.806	52.8414	-4.2499	670.067	790.278
0.8353	264.207	80.1053	453.93	46.5173	-9.91642	675.936	791.695
0.837	262.942	84.3213	453.93	44.5498	-5.66653	679.983	793.314
0.8387	261.958	92.4724	453.227	48.3442	4.04752	679.578	794.528
0.8403	262.52	98.0938	451.822	54.6683	12.3449	675.329	794.933
0.842	264.207	97.2506	451.26	59.4465	12.9521	670.876	794.528
0.8437	266.315	90.2239	453.227	58.0412	4.85702	669.46	795.135
0.8453	267.158	83.4781	458.708	50.4523	-5.26178	672.698	796.552
0.847	267.018	82.0728	464.33	42.0201	-10.1188	678.364	796.754
0.8487	266.737	86.4294	467.421	40.0526	-6.88078	681.602	796.147
0.8503	267.158	92.0507	467	47.0794	1.21426	678.971	794.933
0.852	268.985	95.002	463.908	58.6033	8.29741	672.698	793.516
0.8537	271.093	92.894	460.254	66.4733	9.71405	668.448	793.921
0.8553	272.639	87.6942	459.13	65.068	5.0594	670.876	795.945
0.857	273.061	84.7429	462.221	56.3548	-1.41663	677.352	798.171
0.8587	271.796	86.851	468.686	46.0957	-4.65465	682.614	798.778
0.8603	268.282	92.7535	473.886	41.5985	-2.63089	683.221	796.754
0.862	265.191	98.0938	474.729	45.2525	3.23801	680.59	793.921
0.8637	265.612	99.3586	471.356	53.8251	8.29741	677.757	792.909
0.8653	269.969	95.7047	466.156	60.8519	10.7259	676.745	795.54
0.867	275.169	89.3806	464.048	60.9924	9.30929	678.364	800.397
0.8687	277.417	85.024	468.405	55.0899	6.47603	679.983	803.028
0.8703	276.714	86.1483	477.399	47.9226	3.44039	679.376	799.183
0.872	273.763	92.4724	485.55	44.5498	2.22614	676.948	791.29
0.8737	271.515	98.656	488.361	47.2199	2.22614	675.126	786.433
0.8753	271.796	99.3586	485.129	53.8251	2.83326	675.329	790.278
0.877	275.169	93.4561	478.805	59.8681	2.83326	677.959	800.802
0.8787	280.087	86.1483	474.729	61.2735	1.82138	682.209	810.111
0.8803	283.882	83.6187	476.134	56.7764	0.8095	686.459	810.111
0.882	283.741	87.132	482.88	49.4685	0.8095	688.685	800.397
0.8837	281.212	93.1751	489.907	45.2525	1.82138	687.673	787.647
0.8853	279.244	98.7965	492.577	47.6416	3.23801	684.436	781.171
0.887	280.087	100.905	491.312	55.7926	4.04752	680.59	785.826
0.8887	282.336	97.9533	489.204	63.1005	4.45227	678.364	799.183
0.8903	283.882	91.6292	488.502	63.1005	2.42851	678.364	813.147
0.892	283.741	87.2726	489.204	55.6521	-0.40475	680.186	816.789
0.8937	282.195	88.678	490.188	47.2199	-1.01188	682.816	806.266
0.8953	281.071	94.5805	491.031	44.1282	2.22614	684.84	790.076
0.897	280.509	99.7803	492.156	48.2037	7.08316	684.84	780.564
0.8987	281.071	100.483	494.264	57.6196	8.70217	681.805	784.409
0.9003	282.336	96.4074	496.653	67.176	6.67841	676.745	797.564
0.902	284.866	90.9265	498.761	69.4246	3.23801	672.495	811.123
0.9037	287.957	87.5537	499.604	62.1167	0.60713	673.103	816.385
0.9053	290.065	87.5537	499.463	51.0144	0.20238	680.59	810.111
0.907	289.363	90.0833	497.777	44.5498	1.82138	690.102	797.564
0.9087	286.271	93.5966	496.653	47.501	2.22614	693.947	789.064
0.9103	282.617	95.2831	496.934	57.4791	1.21426	688.685	792.909
0.912	282.336	92.3318	499.604	67.176	-0.20238	678.567	805.659
0.9137	286.271	87.132	503.961	68.5814	-0.40475	671.079	817.396
0.9153	291.471	84.3213	506.912	60.1492	-0.8095	670.067	819.016
0.917	294.984	86.851	506.912	47.9226	-0.8095	676.948	809.301
0.9187	295.687	91.7698	504.382	41.7391	-0.20238	687.673	792.909
0.9203	294.141	94.5805	501.712	45.6741	1.82138	696.983	782.588
0.922	291.611	91.7698	500.728	55.371	5.46415	698.602	788.659
0.9237	290.487	85.3051	502.977	62.6789	10.3212	690.709	807.278
0.9253	292.736	80.5269	506.912	62.3978	13.9639	679.376	825.289
0.927	296.811	82.0728	510.425	55.0899	13.5592	672.698	829.134
0.9287	299.622	88.678	513.657	46.0957	7.48791	675.329	815.373
0.9303	298.919	94.5805	515.906	42.3012	-3.03564	683.828	794.528
0.932	294.844	95.4236	517.03	46.5173	-11.7378	690.709	782.588
0.9337	290.768	90.5049	517.311	56.4953	-12.5473	691.114	788.659
0.9353	289.784	82.4944	517.733	64.9274	-5.0594	686.055	808.29
0.937	292.314	77.5756	518.857	65.7707	4.45227	680.995	826.099
0.9387	296.811	79.4026	520.403	58.6033	9.30929	679.578	829.742
0.9403	300.887	88.3969	521.528	48.7658	8.29741	682.614	818.408
0.942	302.714	98.656	521.387	43.8471	3.23801	687.066	801.004
0.9437	302.292	101.607	520.263	47.501	-2.42851	689.293	791.29
0.9453	300.184	93.8777	519.982	56.9169	-4.65465	687.673	795.54
0.947	298.638	80.5269	521.808	65.6301	-2.42851	683.626	810.111
0.9487	299.622	71.3921	525.181	66.8949	2.22614	681.198	823.265
0.9503	302.573	74.3433	528.835	60.1492	5.66653	684.233	826.099
0.952	305.946	87.6942	530.803	50.8739	5.0594	691.721	818.004
0.9537	307.492	101.607	530.662	46.7983	0.8095	698.804	806.671
0.9553	306.789	106.104	528.554	51.7171	-3.64277	699.209	800.397
0.957	304.541	98.3749	526.587	62.3978	-5.0594	691.923	804.04
0.9587	302.714	84.6024	526.727	70.2678	-2.02376	684.436	813.754
0.9603	303.135	74.3433	529.96	69.7056	2.42851	682.614	821.039
0.962	305.384	74.9055	534.035	61.2735	6.07128	685.447	818.611
0.9637	307.773	85.024	537.689	51.9982	5.0594	688.483	807.885
0.9653	307.492	96.1264	539.516	48.3442	0.20238	688.685	796.552
0.967	305.384	99.3586	539.516	52.2792	-4.65465	686.459	793.516
0.9687	304.26	92.7535	537.127	59.8681	-4.04752	683.221	801.814
0.9703	306.649	83.1971	535.159	64.9274	3.44039	680.995	815.778
0.972	311.286	78.6999	535.159	63.8032	11.3331	683.221	825.492
0.9737	314.659	81.9322	538.392	57.4791	13.3568	689.09	822.861
0.9753	314.659	89.8022	542.889	51.5765	8.29741	693.542	810.111
0.977	312.692	96.4074	546.964	51.5765	2.22614	693.34	798.171
0.9787	311.286	96.4074	548.229	57.4791	-1.82138	689.09	797.159
0.9803	311.848	90.0833	547.667	65.068	-2.42851	685.245	808.492
0.982	313.816	81.9322	546.964	69.003	0.60713	683.828	822.861
0.9837	316.346	78.6999	548.229	66.0517	5.0594	686.459	829.337
0.9853	317.61	82.7755	551.883	57.4791	8.29741	690.304	822.861
0.987	317.891	90.9265	555.818	48.7658	8.09504	692.328	808.897
0.9887	317.47	96.829	557.083	46.5173	4.04752	689.697	799.183
0.9903	316.064	96.1264	555.537	51.7171	-0.40475	685.245	801.409
0.992	313.535	89.3806	552.586	60.1492	-1.41663	681.805	813.754
0.9937	311.848	80.9485	550.478	66.1923	1.21426	683.221	826.503
0.9953	313.394	77.9972	551.04	66.7544	4.45227	686.864	829.134
0.997	318.313	83.6187	553.71	61.6951	6.07128	689.09	820.028
0.9987	322.81	95.002	557.364	54.5278	5.46415	690.102	807.682
1.0003	324.075	103.575	560.456	50.1712	3.23801	690.709	801.814
1.002	320.843	102.872	562.283	53.1224	0.8095	692.328	806.873
1.0037	316.346	92.894	562.564	61.6951	-0.40475	692.935	818.408
1.0053	314.097	81.9322	561.44	69.8462	0.20238	690.709	827.515
1.007	316.064	77.5756	560.456	71.9542	1.61901	686.459	828.73
1.0087	321.264	82.4944	562.283	66.0517	2.83326	683.221	821.849
1.0103	326.745	91.7698	566.358	56.3548	2.83326	683.626	811.528
1.012	329.275	98.0938	570.012	49.328	1.21426	686.864	805.659
1.0137	326.886	96.829	571.418	49.7496	0.8095	689.697	809.301
1.0153	321.686	89.0996	570.434	56.7764	4.04752	690.304	819.016
1.017	318.594	81.6512	568.888	64.6464	9.10692	689.09	828.123
1.0187	320.421	80.9485	567.342	68.0192	10.3212	687.066	830.146
1.0203	326.324	88.2563	567.342	65.068	6.07128	685.852	824.277
1.022	330.961	97.9533	570.293	58.7439	-0.40475	687.066	814.766
1.0237	330.54	102.029	575.212	53.1224	-5.0594	691.923	809.301
1.0253	325.34	97.6722	579.569	51.9982	-4.65465	697.792	812.135
1.027	319.999	88.3969	580.131	56.3548	0.8095	700.423	822.254
1.0287	319.297	81.9322	578.163	62.3978	7.08316	697.792	831.765
1.0303	324.497	82.7755	576.758	65.068	9.10692	691.316	833.587
1.032	332.788	90.9265	578.444	62.1167	4.04752	684.84	826.908
1.0337	338.972	100.202	581.255	55.371	-4.04752	681.602	817.396
1.0353	339.815	104.699	583.644	50.8739	-8.90454	684.436	814.766
1.037	335.739	100.905	583.785	53.544	-6.27365	691.114	820.23
1.0387	330.399	91.6292	582.52	62.1167	2.42851	696.578	828.527
1.0403	328.151	83.6187	580.834	70.1273	10.9283	698.602	831.765
1.042	330.961	81.9322	581.115	70.9705	11.9402	697.185	827.111
1.0437	337.847	86.4294	583.644	64.6464	3.84514	692.733	816.992
1.0453	342.766	93.8777	586.595	56.3548	-6.27365	687.673	807.885
1.047	342.626	99.9208	588.282	53.1224	-9.30929	686.459	806.671
1.0487	337.847	100.905	589.266	58.0412	-0.20238	690.709	813.551
1.0503	331.945	96.5479	589.266	67.8787	13.9639	696.983	823.873
1.052	328.994	90.2239	588.985	74.9055	20.8447	699.411	830.349
1.0537	332.367	87.2726	589.406	72.7974	13.3568	695.566	829.134
1.0553	340.237	90.2239	590.671	62.3978	-4.2499	689.293	822.658
1.057	347.544	96.829	592.638	51.5765	-20.2376	687.673	816.385
1.0587	348.95	100.623	594.887	48.6253	-22.8685	692.733	816.385
1.0603	343.469	98.7965	597.417	56.0737	-10.5236	698.804	822.254
1.062	335.739	92.894	598.682	68.3003	8.70217	699.411	830.349
1.0637	332.788	88.3969	598.963	76.0297	20.8447	694.554	835.206
1.0653	337.566	88.3969	599.384	73.5001	16.7972	688.685	833.587
1.067	345.718	92.894	600.368	62.8194	0.20238	686.864	827.111
1.0687	349.793	98.3749	600.79	51.9982	-15.7853	690.304	820.028
1.0703	346.42	100.483	600.79	48.3442	-20.2376	696.173	817.599
1.072	338.972	96.829	600.79	55.7926	-10.5236	699.816	821.646
1.0737	334.475	90.2239	601.492	68.0192	5.66653	698.602	828.527
1.0753	337.145	85.3051	602.335	75.3271	17.8091	691.923	832.372
1.077	345.577	85.4456	603.741	72.7974	17.202	683.626	829.337
1.0787	353.587	90.9265	605.708	63.9437	4.45227	678.971	821.646
1.0803	355.977	98.0938	608.941	55.7926	-9.30929	683.221	814.361
1.082	351.339	102.872	610.908	54.2467	-13.7616	693.542	813.754
1.0837	343.469	102.45	610.486	59.1655	-5.8689	704.471	821.646
1.0853	338.269	97.6722	607.535	66.1923	8.09504	708.316	831.968
1.087	339.393	91.7698	604.865	69.7056	16.5948	703.661	836.218
1.0887	345.015	88.3969	604.865	67.176	13.3568	693.542	831.765
1.0903	350.496	90.5049	607.395	61.2735	0.8095	686.055	821.849
1.092	353.025	96.5479	611.892	56.3548	-9.91642	685.852	814.159
1.0937	353.447	101.607	616.67	57.198	-9.91642	691.923	814.766
1.0953	353.447	101.045	619.34	63.5221	0.60713	699.209	823.265
1.097	353.869	95.4236	619.059	70.2678	13.3568	703.459	833.384
1.0987	354.571	88.678	616.811	70.5489	16.5948	703.459	837.229
1.1003	355.274	85.3051	614.843	63.8032	6.47603	699.816	832.777
1.102	355.977	87.132	614.562	55.371	-9.91642	695.971	822.861
1.1037	355.977	93.1751	616.67	52.4198	-20.2376	693.34	817.599
1.1053	355.695	99.0775	621.167	56.0737	-16.3925	693.34	822.861
1.107	355.695	100.623	626.086	63.1005	-0.8095	695.161	836.015
1.1087	355.414	97.2506	629.037	68.7219	15.7853	697.185	846.943
1.1103	355.695	92.7535	628.616	69.7056	20.44	695.161	846.336
1.112	357.101	90.6454	625.945	65.6301	10.3212	690.102	833.384
1.1137	359.068	91.2076	622.573	59.8681	-5.8689	687.066	817.396
1.1153	360.474	93.4561	621.448	57.6196	-15.9877	691.114	812.135
1.117	360.474	97.5316	623.697	61.9762	-11.5354	698.602	821.242
1.1187	359.49	101.326	628.897	70.1273	4.04752	704.471	837.837
1.1203	358.928	101.748	634.518	75.046	17.8091	704.471	850.586
1.122	359.771	98.656	638.172	73.0785	18.821	698.197	849.574
1.1237	362.02	94.1588	637.61	65.349	5.66653	689.697	835.61
1.1253	364.268	91.6292	634.237	58.3222	-11.5354	685.447	819.623
1.127	365.252	92.7535	630.864	56.9169	-20.2376	688.685	814.361
1.1287	364.69	96.5479	630.161	61.6951	-14.3687	697.185	822.658
1.1303	362.722	100.623	632.691	69.003	1.21426	705.28	838.848
1.132	360.052	102.029	636.345	73.219	14.9758	706.292	852.61
1.1337	358.647	100.483	639.296	71.9542	16.7972	700.828	852.812
1.1353	360.474	97.5316	640.139	66.4733	5.46415	692.328	838.646
1.137	364.971	95.8453	639.296	60.8519	-9.91642	687.673	819.42
1.1387	370.171	96.1264	638.313	58.7439	-16.9996	690.709	810.111
1.1403	373.122	97.5316	639.999	60.8519	-11.1307	698.602	818.004
1.142	371.295	99.3586	643.793	65.068	-0.20238	706.292	835.61
1.1437	366.517	100.202	646.885	67.8787	6.07128	708.923	848.967
1.1453	362.02	98.7965	646.885	67.8787	2.22614	704.673	848.967
1.147	361.317	96.1264	644.215	65.068	-8.49979	697.792	837.634
1.1487	365.814	94.721	641.264	61.2735	-16.3925	694.959	825.289
1.1503	373.403	95.7047	641.123	59.7276	-12.7497	698.197	822.658
1.152	378.322	97.9533	644.637	62.1167	0.20238	705.28	830.146
1.1537	377.197	98.7965	651.242	67.3165	12.9521	709.935	841.075
1.1553	371.717	97.2506	657.847	70.9705	16.5948	706.697	847.753
1.157	366.938	94.2994	660.798	70.8299	8.29741	696.173	845.122
1.1587	367.219	93.5966	658.269	67.3165	-4.65465	685.447	835.61
1.1603	372.419	96.5479	652.647	63.8032	-12.5473	683.221	826.503
1.162	378.743	101.607	649.415	62.3978	-9.51167	692.935	824.885
1.1637	380.851	104.98	651.663	64.2248	1.21426	709.328	833.384
1.1653	377.197	103.996	657.144	67.5976	11.5354	720.256	846.741
1.167	371.295	99.7803	661.641	70.1273	14.5711	718.637	853.824
1.1687	368.625	95.002	663.047	70.9705	9.10692	705.685	849.574
1.1703	371.576	92.894	661.641	69.8462	0.60713	691.114	837.634
1.172	377.9	95.2831	659.674	66.4733	-5.0594	685.447	826.908
1.1737	382.397	100.623	659.112	63.1005	-5.0594	691.114	824.885
1.1753	381.976	104.98	661.641	62.3978	0.20238	701.03	832.98
1.177	379.024	104.98	665.576	65.068	8.29741	707.709	845.122
1.1787	377.479	101.045	668.949	68.3003	13.5592	706.697	852.61
1.1803	378.743	96.9695	670.495	69.8462	11.3331	702.042	850.384
1.182	381.554	95.2831	671.198	69.7056	3.44039	699.209	840.265
1.1837	383.803	95.7047	671.619	68.3003	-4.2499	700.221	830.146
1.1853	384.365	98.656	672.041	66.0517	-6.67841	704.673	828.527
1.187	383.803	103.153	672.463	64.6464	-1.41663	710.34	837.027
1.1887	382.678	106.526	673.727	65.349	5.66653	711.959	848.967
1.1903	381.695	105.823	675.273	67.5976	8.09504	706.899	854.431
1.192	381.273	101.045	676.819	69.7056	3.44039	700.423	848.36
1.1937	381.976	95.7047	677.522	70.5489	-4.65465	698.197	833.991
1.1953	383.803	93.8777	677.522	69.1435	-10.1188	701.435	821.646
1.197	385.63	97.9533	677.241	66.4733	-7.69029	706.09	821.849
1.1987	386.192	106.104	677.944	63.9437	1.21426	707.911	836.218
1.2003	386.051	113.272	680.192	63.9437	8.70217	705.685	852.812
1.202	385.349	114.255	682.722	67.176	9.10692	701.435	859.491
1.2037	385.63	108.634	684.127	70.9705	3.23801	699.209	851.193
1.2053	387.878	99.9208	684.268	71.6731	-4.04752	701.03	835.206
1.207	391.954	94.5805	683.143	67.5976	-7.69029	705.28	824.48
1.2087	395.327	96.1264	681.598	62.1167	-5.26178	707.911	828.73
1.2103	396.451	103.153	680.895	60.8519	0.8095	707.304	844.717
1.212	394.905	110.32	683.003	65.6301	5.46415	705.685	859.693
1.2137	392.094	113.272	687.5	72.7974	5.0594	706.09	862.324
1.2153	390.548	111.304	691.997	77.154	1.82138	706.697	850.586
1.217	390.97	106.245	693.824	74.9055	-1.41663	703.661	833.587
1.2187	392.797	101.326	692.419	66.4733	-2.02376	698.804	824.885
1.2203	394.343	98.7965	690.451	58.0412	0.8095	696.578	830.146
1.222	394.624	100.202	689.749	56.0737	5.46415	699.411	843.705
1.2237	392.797	103.575	690.873	62.1167	7.48791	706.09	854.431
1.2253	390.548	106.245	693.543	71.9542	5.46415	711.149	855.241
1.227	389.705	106.807	696.494	77.9972	2.22614	712.161	846.336
1.2287	389.705	105.823	698.602	75.7487	-0.20238	707.911	835.61
1.2303	390.829	104.98	697.478	67.176	-0.8095	700.423	832.98
1.232	392.375	104.98	693.402	58.6033	0.20238	694.352	840.872
1.2337	393.921	106.104	689.467	56.9169	2.83326	693.947	852.812
1.2353	395.748	107.229	689.889	64.5058	4.85702	698.804	860.3
1.237	397.716	106.807	696.354	75.046	5.0594	706.09	858.074
1.2387	398.699	103.996	704.505	80.6674	5.0594	709.53	847.753
1.2403	398.278	100.483	709.845	78.2783	5.0594	706.697	836.015
1.242	397.997	99.3586	709.002	70.2678	4.85702	698.602	830.753
1.2437	400.105	102.45	702.818	63.1005	4.04752	691.721	837.027
1.2453	403.056	107.931	697.197	62.8194	3.23801	692.935	850.991
1.247	404.18	111.304	696.916	69.7056	0.8095	702.447	862.122
1.2487	402.353	109.196	702.818	77.2946	-1.01188	714.387	861.717
1.2503	399.402	103.575	710.548	78.6999	-0.8095	721.673	850.384
1.252	398.418	100.202	714.904	72.3758	1.61901	719.042	837.027
1.2537	400.948	102.169	713.499	64.2248	3.44039	709.328	831.158
1.2553	405.726	108.353	707.597	60.1492	2.83326	701.03	837.229
1.257	409.38	114.677	702.116	63.241	1.21426	700.828	850.586
1.2587	409.521	116.223	700.991	71.9542	0.8095	706.09	860.098
1.2603	405.726	112.007	705.629	79.8242	3.23801	711.149	857.872
1.262	401.229	103.575	711.25	80.2458	6.67841	713.173	846.336
1.2637	399.402	96.4074	713.78	73.0785	9.10692	710.542	835.003
1.2653	403.056	95.8453	711.391	63.5221	8.29741	706.09	831.765
1.267	409.942	102.731	707.315	59.1655	4.85702	704.066	839.456
1.2687	415.704	111.304	705.067	63.241	-0.20238	706.697	851.598
1.2703	416.547	115.38	707.175	73.0785	-3.44039	712.566	858.479
1.272	413.596	112.007	712.375	79.8242	-3.44039	716.411	855.848
1.2737	409.802	104.558	717.575	78.2783	0.20238	715.197	847.753
1.2753	408.256	99.3586	719.823	69.7056	5.0594	709.53	842.086
1.277	409.521	100.483	718.277	60.9924	6.67841	704.471	844.11
1.2787	413.175	106.245	715.326	59.4465	4.04752	703.054	852.61
1.2803	415.704	112.007	714.904	65.7707	-0.8095	706.899	862.122
1.282	414.72	113.272	718.418	75.046	-3.03564	712.768	866.169
1.2837	411.207	109.899	724.601	80.2458	-0.8095	715.399	861.717
1.2853	408.256	104.277	729.098	77.154	4.85702	712.566	849.574
1.287	408.256	100.483	728.817	68.5814	9.91642	707.304	837.027
1.2887	411.769	100.483	724.18	61.2735	11.3331	703.054	832.777
1.2903	417.672	104.699	718.699	61.2735	8.09504	701.435	840.265
1.292	421.747	110.883	716.45	67.8787	1.21426	702.042	854.431
1.2937	420.623	113.974	718.98	76.1703	-5.66653	705.078	866.574
1.2953	415.142	111.585	724.18	81.2296	-7.89266	709.328	867.181
1.297	410.223	106.245	727.974	80.2458	-4.2499	712.566	856.455
1.2987	410.504	102.872	727.553	73.0785	2.83326	713.173	841.884
1.3003	416.547	104.277	723.477	61.5546	7.69029	710.34	834.396
1.302	424.558	108.634	719.121	54.2467	6.47603	705.078	839.456
1.3037	428.633	113.272	717.153	58.7439	0.20238	698.804	854.431
1.3053	426.525	115.801	717.996	72.3758	-6.27365	695.566	869.205
1.307	419.78	113.974	720.245	82.4944	-8.90454	698.602	874.062
1.3087	413.877	109.758	721.229	79.8242	-5.8689	706.697	865.36
1.3103	413.175	106.948	719.402	66.1923	1.21426	714.387	849.372
1.312	418.796	108.072	715.748	54.9494	8.09504	716.816	837.837
1.3137	426.104	112.007	712.796	56.4953	8.29741	713.173	839.456
1.3153	430.882	114.396	711.25	68.5814	1.21426	706.899	852.812
1.317	430.601	113.553	710.267	79.5431	-9.30929	703.459	868.8
1.3187	426.807	109.899	709.424	81.3701	-14.7735	705.28	876.288
1.3203	422.872	105.683	706.894	74.2028	-12.1426	712.161	870.824
1.322	421.747	103.153	703.24	64.5058	-3.03564	719.447	855.848
1.3237	423.293	103.856	699.727	59.4465	4.45227	721.268	842.491
1.3253	425.823	108.353	697.197	63.8032	6.47603	715.804	839.456
1.327	428.071	113.974	695.37	74.2028	4.04752	706.292	848.967
1.3287	429.055	116.926	693.402	80.9485	1.82138	699.816	862.931
1.3303	428.633	114.958	690.451	77.5756	1.61901	702.042	869.609
1.332	428.071	109.477	687.219	67.176	2.42851	710.947	862.729
1.3337	428.774	104.98	684.268	58.3222	3.84514	718.435	847.753
1.3353	430.32	106.245	682.3	57.198	3.44039	715.804	837.229
1.337	432.568	113.131	680.614	62.8194	0.60713	703.459	841.075
1.3387	435.098	120.298	678.927	71.2515	-3.64277	691.923	857.467
1.3403	436.082	123.25	676.117	78.2783	-5.66653	692.935	874.467
1.342	433.552	119.877	673.727	80.5269	-1.01188	705.685	879.324
1.3437	429.758	112.007	670.776	76.4513	7.08316	720.054	868.8
1.3453	427.931	105.121	666.139	68.3003	13.3568	724.506	850.991
1.347	430.32	104.699	660.096	62.6789	12.9521	715.399	839.456
1.3487	436.222	110.883	653.35	64.5058	7.08316	698.602	844.11
1.3503	441.984	118.331	647.447	73.219	-0.40475	687.066	860.705
1.352	443.671	121.985	644.215	83.0565	-5.66653	689.293	875.681
1.3537	440.579	118.753	643.793	86.1483	-5.8689	704.066	876.693
1.3553	435.379	111.585	643.793	79.8242	-1.41663	719.447	861.11
1.357	432.147	106.104	643.372	68.3003	5.46415	723.697	841.479
1.3587	431.725	105.683	642.95	58.6033	9.10692	715.197	835.61
1.3603	433.131	109.758	642.669	57.198	7.08316	702.447	849.372
1.362	435.801	114.396	641.685	65.068	0.60713	695.566	870.419
1.3637	438.33	116.223	640.842	77.154	-5.8689	699.209	881.55
1.3653	439.033	113.974	640.561	85.3051	-7.89266	710.34	874.669
1.367	437.628	109.477	641.264	84.3213	-3.03564	720.661	855.443
1.3687	435.801	106.807	643.091	74.9055	6.47603	723.292	838.241
1.3703	435.801	108.634	644.496	62.8194	13.9639	716.411	834.599
1.372	438.33	114.255	644.918	56.7764	13.3568	707.709	847.753
1.3737	442.125	119.174	644.075	60.9924	3.44039	704.066	866.979
1.3753	445.076	120.158	642.669	73.0785	-9.30929	707.709	878.312
1.377	446.482	116.223	642.247	84.6024	-15.7853	714.185	873.859
1.3787	446.2	112.007	643.512	86.5699	-10.5236	717.828	858.479
1.3803	445.498	110.32	646.885	77.154	3.84514	715.399	844.515
1.382	445.076	113.131	650.82	62.3978	17.4043	708.923	841.884
1.3837	444.654	117.909	652.647	53.544	19.8328	704.066	852.812
1.3853	444.795	121.423	651.523	57.4791	10.7259	705.28	871.229
1.387	446.2	121.423	648.993	71.3921	-2.02376	712.768	882.562
1.3887	448.449	117.628	647.588	85.3051	-8.29741	720.661	878.312
1.3903	449.995	111.726	648.712	90.0833	-4.65465	723.899	860.705
1.392	450.276	108.353	651.523	82.4944	4.45227	721.875	843.503
1.3937	449.152	110.18	653.49	67.5976	11.3331	717.423	840.467
1.3953	448.308	115.801	654.474	56.0737	10.9283	713.78	855.443
1.397	448.449	120.579	654.615	55.371	3.84514	712.768	876.086
1.3987	449.433	119.877	655.317	65.349	-5.26178	713.173	886.407
1.4003	450.276	113.974	657.144	77.2946	-9.30929	714.185	879.526
1.402	450.276	107.51	659.393	83.6187	-5.0594	715.197	861.717
1.4037	450.276	105.823	660.939	81.2296	3.84514	716.209	847.348
1.4053	450.276	111.023	661.22	73.5001	10.3212	717.423	847.753
1.407	450.979	119.174	661.22	66.8949	10.3212	719.649	862.931
1.4087	452.103	123.531	661.641	66.1923	4.85702	721.066	881.347
1.4103	454.773	120.579	663.89	70.5489	-1.82138	719.042	887.216
1.412	458.427	112.85	667.966	75.4676	-3.44039	713.578	875.681
1.4137	460.957	106.245	671.619	76.873	-0.20238	708.316	856.253
1.4153	459.832	105.683	672.463	73.9217	5.0594	708.923	844.515
1.417	455.757	111.726	671.198	69.4246	7.48791	715.399	849.372
1.4187	452.103	119.877	669.09	68.5814	6.47603	722.685	866.169
1.4203	452.103	123.671	668.668	73.5001	3.23801	724.506	880.943
1.422	456.459	121.282	670.214	80.1053	-0.40475	719.042	881.55
1.4237	462.503	115.661	672.744	82.3538	-2.02376	710.542	868.598
1.4253	466.297	112.007	674.571	77.154	-1.01188	706.899	852.003
1.427	464.751	112.71	676.398	67.5976	0.8095	711.149	845.729
1.4287	458.146	117.347	678.225	60.1492	1.61901	720.054	854.431
1.4303	451.4	122.406	679.068	60.4303	1.82138	726.125	872.038
1.432	450.276	122.547	679.068	68.7219	3.23801	724.304	884.788
1.4337	456.6	116.926	679.489	80.6674	5.66653	715.399	883.776
1.4353	467.281	109.899	680.052	86.851	7.08316	706.292	869.812
1.437	474.729	107.51	680.052	81.9322	5.46415	704.673	854.229
1.4387	473.183	111.726	680.192	69.4246	2.42851	711.959	848.36
1.4403	463.205	118.331	681.598	59.7276	0.20238	721.875	856.86
1.442	452.384	122.406	683.143	59.8681	-1.01188	727.137	873.859
1.4437	449.573	120.579	684.268	68.7219	-2.02376	723.899	886.204
1.4453	457.724	114.255	685.392	80.1053	-2.63089	716.209	883.776
1.447	469.529	107.931	687.64	86.4294	-2.02376	711.554	868.8
1.4487	475.432	106.807	690.17	83.4781	-1.01188	714.387	852.812
1.4503	471.778	112.71	691.576	72.7974	-0.40475	721.875	849.979
1.452	462.924	121.985	692.278	61.2735	0.20238	727.744	864.348
1.4537	456.6	128.731	693.121	57.6196	1.61901	727.744	885.395
1.4553	458.005	127.747	694.527	63.8032	2.83326	720.661	896.526
1.457	466.156	119.736	696.073	75.046	2.42851	711.554	888.835
1.4587	474.729	110.883	697.9	83.6187	0.8095	708.923	868.8
1.4603	476.978	108.353	699.164	83.8997	-0.40475	715.399	852.205
1.462	470.373	114.677	699.445	75.4676	0.8095	726.125	850.384
1.4637	461.097	124.374	698.743	64.9274	4.04752	731.792	863.336
1.4653	457.724	129.433	698.321	60.5708	5.46415	729.565	881.347
1.467	464.751	125.779	698.04	66.1923	1.82138	722.28	889.038
1.4687	478.383	116.223	698.321	77.2946	-3.44039	716.411	880.943
1.4703	488.08	108.634	699.024	85.3051	-4.65465	714.185	862.931
1.472	486.534	107.931	700.851	84.1808	-0.40475	716.411	849.979
1.4737	475.01	115.099	703.802	75.4676	5.46415	721.268	852.003
1.4753	462.221	124.374	707.597	67.176	8.29741	724.506	865.967
1.477	458.849	129.012	710.969	65.068	5.46415	722.685	881.955
1.4787	467.702	125.498	712.094	69.4246	-2.42851	716.411	888.431
1.4803	482.459	117.207	710.829	74.6244	-9.30929	711.959	883.169
1.482	493.28	110.602	709.002	76.873	-9.30929	712.566	873.455
1.4837	491.734	111.585	709.424	74.9055	-2.42851	716.816	868.598
1.4853	479.086	119.174	712.375	69.8462	6.67841	721.268	871.229
1.487	464.048	127.747	716.029	65.349	11.3331	722.685	877.705
1.4887	457.022	131.26	717.856	65.349	7.69029	719.649	883.169
1.4903	462.503	127.325	716.872	70.1273	-1.41663	715.804	886.204
1.492	476.134	119.174	714.904	75.4676	-9.91642	714.185	883.573
1.4937	488.08	112.71	714.202	77.8567	-10.9283	716.411	875.681
1.4953	489.907	112.428	716.45	75.7487	-4.04752	720.054	867.586
1.497	480.772	119.174	720.947	71.6731	5.0594	722.28	864.348
1.4987	468.686	127.606	724.742	69.7056	9.91642	723.292	867.586
1.5003	463.205	131.26	725.445	71.6731	7.48791	724.304	874.467
1.502	468.405	127.325	723.477	76.5919	-0.8095	725.315	880.336
1.5037	480.351	118.331	721.931	80.6674	-8.49979	724.506	880.943
1.5053	489.907	111.023	723.196	80.6674	-11.7378	722.28	875.478
1.507	490.61	110.883	727.974	76.1703	-8.90454	720.661	868.598
1.5087	483.161	117.628	733.455	69.4246	-2.02376	721.875	866.574
1.5103	475.01	125.077	735.282	65.349	4.45227	725.923	873.05
1.512	472.481	127.325	732.331	67.8787	6.67841	727.744	883.776
1.5137	476.556	123.25	728.255	76.1703	2.83326	726.125	889.038
1.5153	483.723	115.801	727.131	84.6024	-5.0594	722.685	884.788
1.517	488.923	111.304	729.52	87.132	-12.1426	719.649	874.467
1.5187	488.783	114.396	733.596	82.0728	-13.5592	720.661	867.181
1.5203	483.723	123.25	736.969	73.5001	-8.29741	726.125	868.8
1.522	478.805	130.558	737.671	66.7544	0.60713	733.411	877.705
1.5237	478.102	130.276	735.844	66.1923	6.07128	735.637	886.812
1.5253	481.756	122.125	733.877	70.9705	3.84514	729.768	890.454
1.527	486.253	112.428	734.579	77.2946	-3.03564	719.042	885.395
1.5287	488.08	108.072	737.671	80.5269	-6.88078	710.542	875.074
1.5303	487.799	113.131	741.044	79.1215	-4.2499	710.34	866.979
1.532	486.956	124.233	742.731	75.046	1.21426	719.447	867.586
1.5337	486.534	133.509	743.433	72.0947	4.85702	733.006	876.086
1.5353	486.675	133.228	743.855	73.219	3.23801	742.113	885.193
1.537	488.361	123.952	744.557	77.8567	-3.03564	739.886	887.823
1.5387	490.188	113.131	746.525	82.0728	-8.90454	727.542	883.169
1.5403	490.75	108.634	749.195	83.4781	-8.90454	713.78	876.086
1.542	489.907	113.834	751.303	81.2296	-3.03564	707.709	871.431
1.5437	488.783	124.936	751.022	77.154	3.23801	713.173	872.038
1.5453	488.783	134.774	749.476	73.9217	4.85702	725.315	878.716
1.547	490.329	137.163	748.633	73.0785	1.61901	735.434	886.407
1.5487	493.28	129.855	749.757	74.6244	-3.03564	736.244	889.645
1.5503	496.512	118.471	752.708	76.873	-5.26178	727.542	885.8
1.552	498.761	110.32	755.519	77.5756	-4.2499	715.197	878.312
1.5537	498.901	110.602	757.627	76.1703	-1.01188	708.923	874.062
1.5553	496.934	118.05	757.908	73.219	1.61901	712.566	876.693
1.557	493.982	126.904	756.924	70.2678	2.42851	722.28	884.181
1.5587	492.156	131.26	756.081	69.7056	1.82138	730.172	889.645
1.5603	493.28	128.309	756.784	73.0785	0.20238	732.399	888.026
1.562	496.653	120.579	759.033	78.6999	-0.20238	728.756	879.931
1.5637	499.604	113.553	761.422	81.9322	1.21426	723.697	872.038
1.5653	499.463	112.85	762.827	79.8242	3.23801	721.673	870.217
1.567	496.653	118.753	762.546	74.3433	4.85702	724.304	876.086
1.5687	494.685	126.06	762.124	69.4246	4.85702	729.161	884.788
1.5703	495.809	128.45	763.53	67.8787	3.84514	732.399	890.05
1.572	499.885	124.374	766.2	71.6731	2.42851	731.184	887.419
1.5737	504.663	118.331	768.448	79.4026	1.82138	724.911	878.312
1.5753	508.036	115.801	769.151	85.3051	1.82138	717.828	871.229
1.577	507.052	119.877	769.432	85.024	1.61901	715.804	871.836
1.5787	502.274	127.185	769.573	79.1215	0.60713	720.661	879.526
1.5803	496.934	131.822	770.275	72.7974	-1.82138	728.149	888.026
1.582	495.107	130.558	771.681	70.1273	-2.42851	733.411	891.264
1.5837	497.636	124.374	773.508	72.3758	0.20238	734.018	886.407
1.5853	501.712	117.628	774.351	76.873	4.45227	730.172	877.3
1.587	504.804	116.082	774.351	80.2458	7.08316	724.911	872.038
1.5887	506.209	120.298	773.648	80.1053	5.0594	721.673	875.074
1.5903	506.209	126.201	773.508	76.873	-0.8095	722.28	882.966
1.592	505.787	129.012	774.632	73.219	-7.28554	724.911	890.05
1.5937	504.804	126.623	776.599	72.0947	-8.90454	728.149	891.061
1.5953	504.101	121.985	778.848	73.0785	-3.44039	730.375	886.812
1.597	504.663	117.909	780.956	75.4676	5.66653	730.172	880.943
1.5987	507.052	116.926	781.097	78.2783	11.3331	728.554	877.907
1.6003	510.706	121.001	779.832	80.1053	8.70217	727.137	880.336
1.602	514.079	128.028	778.848	79.1215	-0.8095	727.744	886.204
1.6037	515.484	133.087	780.956	76.4513	-9.91642	730.78	891.264
1.6053	513.939	132.103	784.751	74.6244	-11.5354	733.613	891.264
1.607	510.706	126.06	787.561	76.0297	-5.0594	733.411	886.407
1.6087	508.177	119.455	787.702	79.4026	4.45227	729.565	881.55
1.6103	508.177	116.223	786.296	82.3538	9.30929	725.315	881.55
1.612	511.409	119.034	785.734	81.6512	6.47603	724.304	887.216
1.6137	515.484	126.482	786.859	76.5919	-3.03564	728.149	894.299
1.6153	517.03	134.633	788.686	70.2678	-13.1544	735.434	897.133
1.617	515.484	137.303	790.231	67.3165	-15.9877	741.101	893.288
1.6187	513.236	131.682	790.934	70.8299	-9.51167	740.494	885.193
1.6203	513.236	120.861	790.934	78.981	1.21426	733.411	879.324
1.622	516.187	113.834	790.653	86.851	6.67841	725.315	879.931
1.6237	519.982	116.223	791.075	89.8022	3.44039	722.887	885.193
1.6253	521.387	126.06	792.902	86.0078	-4.65465	728.149	890.454
1.627	518.576	135.336	795.572	77.5756	-10.9283	737.863	891.264
1.6287	513.939	137.163	797.68	70.5489	-10.5236	744.541	888.026
1.6303	510.425	130.558	797.961	69.7056	-3.64277	742.113	883.169
1.632	512.112	120.579	796.837	74.6244	5.0594	733.006	880.336
1.6337	518.155	115.38	796.134	80.5269	8.70217	724.911	881.55
1.6353	524.338	118.331	797.258	82.7755	3.84514	724.911	886.204
1.637	526.306	126.201	800.35	79.4026	-5.26178	733.411	891.061
1.6387	523.354	132.806	804.426	73.5001	-11.5354	742.517	891.669
1.6403	518.436	133.649	806.674	70.5489	-10.5236	745.148	888.026
1.642	515.203	129.152	805.128	73.5001	-3.03564	739.279	883.169
1.6437	517.311	123.531	800.631	79.4026	6.07128	730.172	881.347
1.6453	523.776	120.298	798.383	84.1808	9.91642	724.304	883.169
1.647	530.381	121.282	801.053	85.3051	5.0594	725.923	887.216
1.6487	532.208	125.779	807.236	82.3538	-5.8689	733.613	890.454
1.6503	528.133	130.698	811.874	77.2946	-14.1663	740.494	890.657
1.652	521.808	133.228	811.312	73.9217	-12.5473	739.886	887.419
1.6537	518.014	130.979	806.534	75.3271	-1.41663	731.792	882.157
1.6553	519.982	126.06	802.88	80.9485	11.5354	722.887	879.324
1.657	527.008	122.406	804.707	86.0078	17.202	721.066	881.55
1.6587	534.035	123.671	811.312	85.7267	10.9283	728.756	889.645
1.6603	536.003	129.855	818.057	79.4026	-1.41663	742.517	899.764
1.662	533.051	136.179	821.149	70.9705	-11.1307	751.22	903.002
1.6637	527.711	137.725	819.463	67.5976	-10.9283	748.993	895.514
1.6653	524.338	133.509	814.685	73.219	-1.82138	737.863	882.966
1.667	525.603	126.06	810.609	84.1808	7.69029	725.518	876.086
1.6687	531.787	121.001	810.328	91.7698	9.30929	720.256	880.943
1.6703	538.111	121.704	815.106	90.5049	2.22614	725.518	894.299
1.672	540.359	128.309	821.852	80.9485	-7.89266	737.256	907.251
1.6737	538.392	137.163	825.506	70.1273	-12.7497	746.16	910.692
1.6753	533.754	140.957	823.538	65.6301	-9.30929	745.351	900.573
1.677	530.241	136.882	817.776	70.5489	-1.82138	736.649	883.776
1.6787	530.241	128.45	813.701	80.6674	2.42851	728.554	873.455
1.6803	533.754	122.828	813.982	88.3969	2.22614	727.744	878.312
1.682	539.516	123.671	818.76	88.3969	-1.41663	734.422	895.311
1.6837	543.029	130.136	825.084	81.9322	-5.66653	740.291	909.882
1.6853	541.765	136.882	828.738	75.046	-8.29741	738.875	909.275
1.687	536.284	138.428	828.176	73.5001	-6.67841	730.78	893.288
1.6887	531.787	133.509	823.96	78.4188	-1.41663	723.697	875.478
1.6903	531.787	125.779	818.901	86.4294	4.04752	726.125	868.598
1.692	536.986	121.985	817.355	90.6454	6.67841	737.256	876.693
1.6937	543.029	125.358	820.025	87.5537	6.47603	746.767	893.288
1.6953	545.981	133.649	825.225	79.8242	4.04752	745.755	906.644
1.697	544.716	141.238	829.862	73.5001	2.22614	735.637	908.263
1.6987	541.062	142.784	831.689	72.6569	2.83326	724.911	898.549
1.7003	537.83	137.163	830.706	77.8567	5.46415	722.685	885.8
1.702	537.408	128.309	828.176	85.4456	7.69029	731.792	880.943
1.7037	540.078	123.531	826.911	90.2239	7.08316	745.755	887.216
1.7053	544.435	126.201	828.036	87.9753	5.46415	753.851	898.549
1.707	546.683	134.352	831.408	80.2458	3.84514	748.386	906.644
1.7087	545.559	142.363	834.781	73.0785	3.23801	732.803	906.442
1.7103	541.484	144.049	836.327	71.9542	3.44039	720.256	899.156
1.712	538.392	137.725	834.781	78.4188	5.46415	721.268	889.645
1.7137	538.813	127.325	832.111	87.6942	7.69029	735.637	883.776
1.7153	543.732	120.298	831.689	91.6292	7.08316	751.22	885.8
1.717	550.759	122.125	834.781	85.7267	3.84514	755.47	894.907
1.7187	555.818	132.103	839.138	75.3271	1.21426	743.732	903.811
1.7203	555.256	143.908	843.213	69.1435	1.61901	725.315	904.418
1.722	550.056	148.827	845.04	72.7974	4.85702	714.792	895.311
1.7237	543.592	142.925	843.916	83.0565	6.07128	721.268	884.585
1.7253	540.359	130.979	839.981	92.0507	1.82138	739.886	880.538
1.727	543.592	121.985	836.608	92.894	-5.0594	753.851	885.8
1.7287	551.743	121.985	836.327	85.4456	-6.88078	751.624	896.323
1.7303	558.488	130.979	839.278	76.0297	-1.01188	735.029	903.811
1.732	559.191	143.206	843.635	71.9542	9.30929	718.435	902.799
1.7337	554.132	149.249	847.289	76.5919	17.202	714.792	894.299
1.7353	548.229	143.627	848.554	85.7267	17.8091	726.53	887.216
1.737	545.981	130.979	847.711	91.2076	9.91642	745.148	888.026
1.7387	549.353	122.406	846.727	88.2563	-2.02376	758.1	897.133
1.7403	555.537	125.077	848.132	80.1053	-10.5236	756.279	906.644
1.742	559.613	136.882	852.489	74.3433	-10.5236	741.101	909.275
1.7437	559.332	147.281	856.283	76.1703	-3.44039	724.506	903.002
1.7453	555.959	149.108	855.862	83.4781	5.46415	719.042	893.085
1.747	552.305	142.503	851.786	89.3806	9.91642	728.149	886.407
1.7487	551.04	133.509	847.429	89.0996	7.69029	744.541	888.026
1.7503	553.289	127.747	847.289	83.4781	0.8095	754.255	896.526
1.752	558.91	130.558	851.364	76.873	-4.04752	749.601	905.43
1.7537	564.391	139.552	857.408	74.9055	-3.03564	734.422	907.656
1.7553	565.937	148.406	861.905	79.8242	2.22614	720.256	901.18
1.757	562.985	149.53	862.607	88.678	6.67841	717.423	889.442
1.7587	558.629	142.503	859.656	94.2994	7.48791	726.53	879.526
1.7603	556.661	132.525	856.283	91.7698	4.45227	738.875	879.526
1.762	558.207	127.606	855.159	82.4944	0.60713	745.755	891.669
1.7637	562.564	131.401	858.813	72.7974	-1.01188	743.732	908.061
1.7653	565.937	140.957	864.856	69.7056	2.22614	735.434	917.168
1.767	565.515	148.406	870.337	76.0297	7.69029	728.149	913.93
1.7687	561.159	147.281	872.304	87.6942	10.9283	727.542	901.787
1.7703	557.083	137.584	870.758	96.829	7.48791	733.613	890.05
1.772	556.38	125.779	866.964	96.1264	0.60713	740.494	886.812
1.7737	559.894	120.579	863.732	86.0078	-3.44039	742.113	893.692
1.7753	566.218	126.06	864.434	74.3433	-0.40475	737.863	904.823
1.777	571.137	138.287	869.212	70.2678	5.46415	731.184	911.501
1.7787	571.137	149.53	874.412	76.5919	8.70217	727.744	910.287
1.7803	565.515	152.903	877.082	87.9753	7.08316	730.375	901.787
1.782	559.332	146.86	876.661	95.7047	1.21426	737.256	892.276
1.7837	558.207	135.757	874.693	95.002	-5.0594	743.125	889.038
1.7853	563.407	128.028	872.304	87.132	-5.8689	744.541	894.907
1.787	571.839	129.433	871.461	77.5756	-1.01188	738.672	905.633
1.7887	576.336	139.552	873.288	73.0785	5.66653	728.756	911.501
1.7903	573.807	151.778	877.363	76.4513	8.70217	721.268	908.668
1.792	565.234	156.978	881.439	85.024	6.67841	722.887	900.573
1.7937	556.661	151.638	883.266	92.0507	2.22614	733.613	894.299
1.7953	554.553	139.552	882.985	92.3318	-1.01188	745.148	894.299
1.797	560.034	129.433	882.563	86.1483	-0.20238	750.613	900.168
1.7987	569.169	128.309	882.985	78.6999	3.84514	746.97	906.442
1.8003	575.915	135.757	884.53	76.1703	8.29741	736.041	906.442
1.802	578.163	146.438	886.639	80.9485	9.71405	724.506	900.168
1.8037	576.055	152.06	888.185	88.2563	5.46415	723.292	893.085
1.8053	571.418	148.687	890.293	92.4724	-1.41663	735.029	891.264
1.807	567.342	139.833	892.26	90.9265	-5.66653	752.231	896.93
1.8087	568.185	132.806	893.806	85.4456	-4.04752	761.743	905.025
1.8103	574.79	133.509	893.806	79.5431	1.82138	755.267	911.299
1.812	582.52	140.536	891.839	76.5919	7.08316	738.672	911.299
1.8137	585.893	148.687	889.73	78.981	6.47603	723.899	904.418
1.8153	582.66	150.935	890.433	85.024	0.8095	721.673	894.299
1.817	575.915	145.314	894.088	91.2076	-4.04752	732.399	888.431
1.8187	570.855	135.476	898.444	92.4724	-4.65465	746.97	890.657
1.8203	571.137	130.558	901.114	87.5537	-0.20238	754.255	898.145
1.822	576.758	135.476	900.692	79.5431	7.08316	749.601	905.025
1.8237	584.206	147.281	898.163	74.9055	12.9521	737.256	907.251
1.8253	587.439	156.135	896.758	76.4513	13.9639	728.149	904.013
1.827	583.785	155.432	899.006	82.3538	8.70217	730.375	897.942
1.8287	576.758	145.314	903.784	87.6942	1.21426	742.922	894.299
1.8303	571.839	133.087	908.141	87.9753	-1.41663	754.862	895.918
1.832	571.839	127.747	910.109	82.4944	3.44039	755.47	901.383
1.8337	576.617	133.649	910.109	76.1703	11.3331	743.529	907.049
1.8353	581.817	146.438	908.843	74.3433	14.9758	729.161	908.668
1.837	584.206	156.135	907.859	78.6999	11.5354	723.899	906.037
1.8387	583.082	156.276	908.843	85.4456	4.04752	731.387	902.192
1.8403	580.693	146.86	911.092	89.5211	-1.41663	745.351	901.383
1.842	579.288	134.774	913.481	88.2563	-2.42851	756.481	905.025
1.8437	580.412	129.433	914.746	83.0565	1.21426	757.088	910.287
1.8453	583.363	134.211	914.746	77.8567	6.47603	745.351	913.12
1.847	585.331	145.454	914.465	77.2946	9.10692	728.756	911.906
1.8487	585.893	154.73	915.168	82.4944	5.46415	720.661	907.251
1.8503	585.893	155.854	916.995	89.3806	-2.02376	728.554	902.192
1.852	586.736	148.827	918.821	92.0507	-6.88078	746.16	899.156
1.8537	587.439	139.411	919.946	87.9753	-4.65465	758.1	900.573
1.8553	588.282	133.649	920.087	80.5269	2.42851	754.862	906.037
1.857	589.406	136.179	919.946	75.046	9.71405	739.886	912.311
1.8583	590.109	145.454	919.665	75.4676	10.3212	726.53	913.93
1.8603	590.39	154.73	920.789	82.4944	2.42851	725.518	908.263
1.862	589.406	157.259	924.162	91.6292	-9.30929	737.053	898.954
1.8637	587.439	152.2	928.659	97.9533	-16.7972	751.017	890.657
1.8653	586.033	143.487	930.486	96.9695	-13.5592	755.267	889.645
1.867	586.033	136.882	928.659	88.3969	-1.82138	746.16	897.537
1.8687	587.158	137.303	925.286	77.8567	9.30929	732.399	909.882
1.8703	588.563	143.206	923.318	72.6569	10.9283	726.125	918.989
1.872	589.968	149.951	922.897	76.5919	2.42851	732.399	918.18
1.8737	590.811	152.903	924.584	86.5699	-7.69029	744.744	907.251
1.8753	591.233	151.076	928.659	96.1264	-10.1188	753.648	894.299
1.877	591.936	147.281	933.859	99.3586	-3.64277	752.636	888.026
1.8787	593.341	145.033	937.513	94.1588	6.47603	743.732	893.895
1.8803	595.168	145.735	938.216	84.6024	11.9402	734.625	908.263
1.882	596.011	148.406	936.388	78.2783	8.29741	733.006	921.013
1.8837	595.59	150.514	934.561	79.4026	-2.63089	740.494	922.025
1.8853	593.763	150.514	934.983	86.0078	-12.1426	752.029	910.287
1.887	592.638	148.827	937.794	92.7535	-12.1426	757.493	894.907
1.8887	593.06	146.86	941.447	94.2994	-3.03564	752.839	887.216
1.8903	594.887	146.438	942.713	89.8022	9.30929	742.517	892.276
1.892	596.995	147.984	941.588	83.1971	15.583	735.637	907.049
1.8937	598.26	150.654	940.042	79.4026	12.5473	737.863	920.406
1.8953	598.26	152.903	940.886	81.2296	3.84514	747.374	923.239
1.897	597.838	152.481	942.994	86.4294	-3.64277	754.862	914.132
1.8987	597.417	148.687	944.539	90.5049	-3.03564	754.66	900.168
1.9003	597.557	143.908	944.961	90.5049	4.04752	747.374	892.68
1.902	598.963	141.379	945.945	86.5699	11.5354	740.494	897.133
1.9037	600.79	144.049	947.21	82.0728	12.3449	739.482	909.882
1.9053	602.195	150.514	948.897	81.6512	6.47603	746.16	921.418
1.907	603.038	156.276	948.194	86.5699	-1.82138	755.47	924.049
1.9087	603.741	156.978	944.961	92.894	-5.8689	759.517	916.358
1.9103	603.319	151.638	942.291	94.721	-4.04752	753.851	905.025
1.912	601.071	144.752	944.821	90.9265	1.21426	743.529	898.549
1.9137	598.26	142.363	952.269	84.7429	6.47603	737.053	902.192
1.9153	597.136	145.735	959.295	80.9485	7.08316	740.291	913.93
1.917	599.244	152.762	960.42	81.3701	2.42851	751.017	924.656
1.9187	603.319	159.508	955.642	86.1483	-3.44039	760.327	925.263
1.9203	607.114	161.475	949.599	92.7535	-5.0594	760.731	914.537
1.922	607.816	156.557	947.491	96.829	-1.01188	752.029	902.394
1.9237	604.443	148.687	951.988	96.1264	3.84514	740.494	899.764
1.9253	600.79	144.752	959.436	91.6292	5.46415	733.613	909.275
1.927	600.368	148.406	964.917	86.0078	1.82138	736.244	921.62
1.9287	603.46	155.854	964.917	83.0565	-4.04752	746.363	925.87
1.9303	607.816	161.756	960.842	84.7429	-7.89266	756.481	917.37
1.932	610.768	161.335	956.345	90.0833	-6.67841	759.517	901.787
1.9337	610.486	156.135	954.798	95.002	0.60713	753.851	891.061
1.9353	607.535	150.654	957.89	95.7047	10.3212	745.148	893.692
1.937	605.146	149.811	963.512	91.3481	15.1782	740.291	908.263
1.9387	605.146	153.886	967.587	85.4456	10.7259	742.922	924.656
1.9403	608.519	159.508	967.447	83.0565	-0.40475	749.398	931.132
1.942	613.438	162.178	964.495	85.4456	-10.1188	753.243	922.632
1.9437	617.092	159.508	962.387	90.2239	-11.1307	750.613	906.442
1.9453	617.092	153.184	963.371	92.894	-3.44039	745.351	895.311
1.947	614.14	147.281	967.026	90.9265	7.69029	743.125	897.133
1.9487	610.768	145.876	971.101	85.3051	13.5592	746.97	910.287
1.9503	608.941	150.233	973.349	80.9485	10.7259	753.851	924.049
1.952	610.065	156.838	972.787	83.0565	2.42851	757.088	929.108
1.9537	614.421	161.054	971.523	90.5049	-3.64277	754.255	923.037
1.9553	619.762	160.351	971.101	97.6722	-3.03564	747.779	911.299
1.957	623.135	154.73	972.646	98.0938	1.82138	742.517	902.799
1.9587	623.135	147	976.441	91.2076	5.0594	741.101	904.013
1.9603	621.167	142.784	980.095	81.9322	4.85702	743.125	914.537
1.962	618.497	145.454	981.219	75.7487	2.22614	746.363	925.87
1.9637	617.092	153.184	978.971	76.5919	0.20238	748.386	928.501
1.9653	618.497	160.211	975.738	84.1808	0.8095	747.374	921.013
1.967	622.01	162.037	974.615	93.4561	5.46415	744.541	909.68
1.9687	626.367	157.259	976.863	97.6722	10.9283	742.517	903.002
1.9703	628.334	149.249	981.641	94.1588	12.3449	743.529	906.442
1.972	627.21	143.627	986.841	85.3051	6.07128	746.16	916.156
1.9737	623.135	144.752	989.37	77.5756	-3.64277	747.779	924.656
1.9753	618.497	151.357	987.263	76.0297	-10.1188	747.779	925.263
1.977	616.811	157.962	982.344	81.6512	-8.29741	748.386	917.775
1.9787	620.043	159.929	978.268	91.2076	-0.8095	748.993	909.275
1.9803	625.524	156.838	978.971	98.3749	5.66653	748.386	907.251
1.982	628.334	151.778	983.889	98.0938	6.07128	746.16	913.93
1.9837	627.772	150.514	989.652	90.6454	1.21426	744.541	922.632
1.9853	624.259	155.713	992.322	82.0728	-4.65465	746.363	925.668
1.987	621.167	163.162	991.197	78.981	-7.89266	752.636	919.394
1.9887	622.291	166.254	988.527	82.4944	-6.67841	758.1	908.87
1.9903	627.913	162.74	986.7	90.2239	-3.03564	759.112	903.002
1.992	633.815	155.854	986.419	96.829	0.20238	753.648	907.049
1.9937	635.221	151.076	987.965	97.9533	0.60713	745.351	917.775
1.9953	631.286	151.638	991.338	93.5966	-2.02376	740.494	926.882
1.997	625.664	156.838	994.851	87.6942	-5.26178	742.922	926.477
1.9987	623.135	162.881	996.397	84.7429	-5.66653	749.601	916.358
2.0003	626.789	165.129	995.414	86.0078	-1.01188	755.267	903.406
2.002	634.799	161.756	993.446	88.678	5.46415	755.47	898.145
2.0037	641.264	155.151	993.024	90.5049	8.70217	752.029	905.43
2.0053	641.264	150.233	994.992	89.3806	4.85702	748.993	920.001
2.007	634.096	149.951	998.927	86.1483	-4.04752	748.386	932.751
2.0087	624.962	154.589	1003.14	84.7429	-9.91642	749.398	933.763
2.0103	622.01	160.913	1006.09	87.132	-7.69029	751.017	921.62
2.012	628.334	164.708	1005.39	91.7698	2.22614	752.839	905.43
2.0137	639.999	162.459	1002.02	95.7047	11.5354	752.231	895.918
2.0153	648.291	155.151	1000.19	96.9695	12.9521	748.386	898.549
2.017	647.869	148.827	1003.42	94.721	3.23801	744.136	910.692
2.0187	639.999	148.827	1009.33	89.5211	-10.5236	743.529	923.644
2.0203	630.161	155.011	1013.12	83.8997	-16.3925	747.982	930.12
2.022	625.945	162.037	1012	81.6512	-10.1188	754.255	926.275
2.0237	630.443	165.129	1007.64	84.3213	2.83326	757.493	914.132
2.0253	640.842	162.74	1004.13	90.0833	11.9402	755.267	902.799
2.027	648.993	156.276	1004.69	95.2831	10.7259	748.386	901.18
2.0287	649.696	150.654	1009.47	97.2506	1.21426	742.113	910.894
2.0303	642.388	150.233	1016.07	94.721	-8.90454	742.922	924.656
2.032	633.534	155.713	1020.85	88.8185	-12.5473	751.22	931.537
2.0337	631.145	163.162	1020.99	83.4781	-6.88078	761.743	925.87
2.0353	637.048	166.254	1016.92	82.4944	3.44039	765.588	913.12
2.037	647.166	162.178	1012.84	87.2726	10.9283	760.327	904.013
2.0387	654.474	154.027	1013.4	95.2831	9.10692	750.613	906.644
2.0403	653.49	148.827	1019.44	100.623	-0.20238	743.732	917.775
2.042	645.761	149.951	1027.6	98.656	-8.90454	744.744	927.894
2.0437	638.172	156.838	1031.95	91.2076	-9.91642	752.029	929.108
2.0453	636.767	164.286	1028.72	85.3051	-1.82138	759.517	921.418
2.047	642.388	167.237	1020.99	85.3051	9.10692	761.338	911.906
2.0487	650.539	164.286	1014.95	89.5211	13.3568	756.481	908.668
2.0503	654.615	158.805	1015.23	94.1588	7.08316	748.791	914.537
2.052	651.523	155.713	1021.69	96.1264	-5.0594	744.744	924.656
2.0537	644.215	157.962	1030.55	94.721	-14.3687	746.97	930.525
2.0553	639.015	164.708	1037.15	91.2076	-14.1663	753.648	926.477
2.057	640.421	171.453	1037.86	87.6942	-3.44039	759.517	916.156
2.0587	648.572	173.28	1031.95	87.132	9.71405	761.136	908.668
2.0603	658.55	168.362	1023.52	90.0833	13.5592	756.481	911.299
2.062	663.047	160.351	1018.74	93.8777	6.47603	750.005	921.418
2.0637	657.988	155.151	1021.97	95.8453	-5.66653	746.363	930.727
2.0653	647.166	156.978	1031.67	93.5966	-14.1663	748.791	933.156
2.067	640.139	164.286	1042.07	87.9753	-12.5473	753.648	926.477
2.0687	643.793	171.313	1046.43	83.0565	-2.02376	756.886	917.168
2.0703	656.02	172.578	1042.77	82.7755	9.71405	756.279	911.501
2.072	667.825	167.237	1035.04	87.6942	12.5473	753.243	913.525
2.0737	670.776	158.805	1029.14	94.5805	4.04752	751.017	920.406
2.0753	663.187	154.027	1029.42	98.3749	-8.29741	750.613	925.87
2.077	651.944	156.135	1035.75	96.9695	-13.7616	751.624	926.477
2.0787	645.199	163.162	1044.18	90.9265	-7.89266	754.255	922.025
2.0803	646.885	169.205	1049.38	83.4781	4.85702	758.1	915.549
2.082	655.598	169.626	1049.1	79.1215	13.5592	761.338	912.513
2.0837	665.014	163.302	1045.02	81.2296	12.3449	760.327	916.156
2.0853	669.09	155.151	1040.95	87.6942	2.42851	754.862	925.263
2.087	665.717	151.778	1040.1	94.1588	-8.29741	747.779	934.37
2.0887	657.425	155.854	1042.35	94.721	-11.7378	743.732	937.406
2.0903	650.539	164.427	1046.15	89.5211	-4.04752	746.16	931.132
2.092	650.82	171.032	1049.8	83.0565	9.71405	752.231	921.418
2.0937	658.55	171.313	1051.77	80.1053	18.4162	757.898	915.144
2.0953	668.387	165.551	1052.05	82.7755	15.583	759.517	917.168
2.097	673.868	158.102	1051.35	88.8185	4.04752	757.088	923.644
2.0987	671.198	155.011	1050.5	94.2994	-5.66653	752.636	930.12
2.1003	663.468	158.384	1050.5	95.002	-6.27365	748.386	932.144
2.102	656.863	166.254	1052.05	91.3481	1.61901	748.386	927.287
2.1037	656.301	172.156	1053.88	87.132	10.7259	753.648	917.775
2.1053	660.798	171.032	1054.16	85.3051	12.9521	761.338	910.894
2.107	667.263	163.162	1053.45	87.2726	6.47603	764.576	912.311
2.1087	671.619	154.589	1053.45	90.9265	-3.64277	761.743	919.799
2.1103	670.917	152.06	1055	93.8777	-10.1188	755.47	926.477
2.112	665.717	157.962	1057.95	94.721	-9.30929	752.231	927.489
2.1137	659.814	167.378	1061.04	92.894	-1.41663	755.267	922.227
2.1153	658.55	174.405	1063.57	89.5211	8.09504	762.755	915.751
2.117	663.047	174.264	1063.15	87.2726	12.5473	768.017	912.513
2.1187	670.214	167.237	1060.48	88.678	9.30929	765.993	915.144
2.1203	675.273	157.681	1058.37	93.8777	1.82138	758.1	922.227
2.122	674.29	152.762	1059.36	98.7965	-3.44039	751.22	929.918
2.1237	667.966	156.557	1063.15	98.656	-2.63089	751.22	932.346
2.1253	662.063	166.113	1066.52	91.6292	3.44039	757.898	928.096
2.127	661.641	172.578	1067.93	83.4781	9.91642	765.588	920.001
2.1287	667.122	171.032	1066.1	80.9485	12.5473	768.219	915.144
2.1303	674.149	163.302	1062.45	87.5537	8.29741	761.136	916.763
2.132	678.365	155.854	1059.5	98.3749	-0.40475	749.398	923.239
2.1337	677.803	154.027	1060.9	105.402	-6.67841	741.506	927.894
2.1353	673.446	159.508	1065.4	103.153	-4.65465	743.732	926.882
2.137	669.371	168.362	1070.32	93.4561	2.42851	755.874	921.418
2.1387	668.949	173.28	1073.97	83.4781	8.09504	770.243	916.358
2.1403	672.322	169.626	1075.1	80.5269	8.09504	775.707	917.168
2.142	677.522	160.351	1073.13	86.0078	2.83326	766.6	923.644
2.1437	681.598	152.903	1068.77	94.721	-3.03564	750.613	931.537
2.1453	682.019	153.184	1065.12	99.0775	-3.64277	740.291	933.965
2.147	678.927	159.508	1065.12	95.4236	0.20238	743.732	930.12
2.1487	675.273	166.535	1068.63	86.5699	4.04752	759.112	922.025
2.1503	673.727	169.064	1072.85	80.1053	5.46415	774.695	914.537
2.152	675.273	166.113	1074.96	80.6674	3.44039	778.743	912.918
2.1537	678.646	159.086	1073.97	87.5537	0.20238	769.231	919.799
2.1553	681.738	152.903	1070.6	95.4236	-1.41663	753.851	929.918
2.157	681.598	152.903	1067.23	98.3749	1.21426	744.744	934.775
2.1587	677.944	159.227	1065.68	93.8777	5.66653	746.97	929.918
2.1603	673.446	166.956	1066.95	84.7429	8.29741	758.708	918.787
2.162	671.901	170.189	1069.76	78.2783	6.67841	770.445	910.287
2.1637	675.414	166.113	1071.3	79.8242	2.83326	774.493	911.501
2.1653	682.441	157.962	1070.32	89.3806	-0.40475	769.231	921.418
2.167	687.5	152.481	1066.95	99.4992	-2.02376	760.124	931.739
2.1687	686.516	154.027	1062.17	102.45	-1.01188	753.243	934.977
2.1703	680.192	161.335	1058.79	95.8453	2.83326	752.231	928.096
2.172	673.727	169.064	1057.95	84.3213	7.08316	756.481	917.168
2.1737	671.901	171.734	1058.37	76.5919	9.30929	762.35	910.894
2.1753	676.117	167.659	1057.95	78.2783	7.48791	766.6	914.132
2.177	684.549	159.789	1056.12	87.6942	2.42851	765.588	924.049
2.1787	691.576	153.886	1052.75	98.656	-2.02376	762.148	932.144
2.1803	692.84	154.589	1048.68	102.731	-2.02376	760.124	933.156
2.182	688.203	161.335	1045.02	95.8453	4.04752	762.148	927.287
2.1837	680.895	168.783	1043.62	84.3213	11.9402	765.386	919.394
2.1853	676.538	171.313	1046.15	77.8567	14.9758	767.005	915.751
2.187	678.927	166.816	1050.92	80.9485	11.3331	764.981	918.787
2.1887	687.219	158.102	1053.88	90.2239	6.07128	761.136	925.87
2.1903	695.651	150.654	1051.35	97.9533	4.04752	757.898	931.739
2.192	697.478	149.53	1043.2	98.7965	6.47603	759.112	932.144
2.1937	692.419	155.151	1034.62	93.4561	9.71405	763.969	927.489
2.1953	685.392	162.881	1031.39	86.4294	9.71405	767.612	922.632
2.197	681.316	166.535	1035.04	84.1808	5.66653	767.207	920.608
2.1987	683.003	162.178	1041.65	87.9753	0.8095	762.957	924.251
2.2003	689.749	152.06	1046.15	94.5805	-1.41663	758.708	931.132
2.202	696.494	143.206	1044.32	98.3749	0.60713	758.1	935.989
2.2037	698.04	142.081	1036.17	96.9695	4.04752	761.136	935.382
2.2053	694.527	149.108	1027.17	91.3481	6.67841	764.576	929.918
2.207	688.765	159.508	1022.82	85.7267	5.0594	764.576	922.632
2.2087	686.516	165.832	1025.77	84.1808	-0.40475	762.148	919.799
2.2103	689.889	163.864	1033.78	87.9753	-6.67841	759.719	923.037
2.212	696.916	154.027	1040.81	92.894	-8.90454	760.124	929.513
2.2137	703.099	142.784	1041.23	93.5966	-4.65465	762.148	933.763
2.2153	703.521	137.303	1035.33	89.8022	4.04752	764.374	932.751
2.217	698.04	141.379	1028.3	84.7429	12.3449	766.195	925.668
2.2187	691.294	150.514	1026.19	82.3538	15.583	766.6	917.168
2.2203	688.765	157.4	1030.13	84.1808	13.3568	765.386	914.537
2.222	691.997	156.978	1037.29	90.0833	7.69029	764.981	920.608
2.2237	697.9	149.249	1042.77	95.7047	0.8095	767.005	930.727
2.2253	701.975	139.13	1042.49	96.4074	-3.03564	768.826	937.608
2.227	700.991	133.649	1036.45	90.5049	-1.01188	768.017	938.013
2.2287	696.916	135.476	1029.14	82.4944	5.46415	765.588	931.739
2.2303	693.824	141.379	1027.31	78.6999	11.5354	764.981	923.644
2.232	694.527	144.33	1032.37	81.9322	12.5473	767.612	919.394
2.2337	699.024	140.254	1040.53	88.8185	8.29741	772.064	923.037
2.2353	705.348	131.26	1046.57	94.721	3.44039	774.088	932.346
2.237	709.705	123.531	1046.15	96.4074	2.42851	770.85	940.846
2.2387	709.424	123.531	1039.54	92.7535	5.46415	763.362	942.263
2.2403	705.348	131.682	1031.95	86.1483	9.91642	756.886	936.596
2.242	700.429	141.238	1029.84	82.3538	12.3449	755.47	929.918
2.2437	698.04	144.611	1035.33	85.4456	9.91642	760.327	927.489
2.2453	699.727	139.13	1044.6	92.4724	4.85702	768.219	932.346
2.247	704.224	128.45	1051.35	96.9695	1.82138	773.886	940.239
2.2487	709.002	121.001	1050.22	95.002	4.04752	773.076	942.87
2.2503	711.25	122.406	1042.49	89.3806	9.30929	766.6	936.596
2.252	709.845	131.822	1034.2	84.1808	13.3568	759.517	925.263
2.2537	706.051	142.081	1032.66	82.7755	12.9521	758.1	916.763
2.2553	702.818	145.454	1039.12	86.1483	8.09504	764.374	917.168
2.257	702.678	139.411	1049.8	93.4561	2.22614	773.481	926.882
2.2587	705.067	128.028	1057.53	98.7965	-1.82138	777.731	939.025
2.2603	708.299	118.753	1057.95	98.7965	-1.01188	776.112	944.084
2.262	710.548	118.471	1052.47	94.1588	4.04752	771.457	938.215
2.2637	710.548	128.731	1047.55	88.8185	11.3331	767.207	926.882
2.2653	709.142	141.8	1048.25	86.0078	15.1782	765.993	918.989
2.267	709.424	147.281	1054.58	87.132	11.9402	768.219	920.608
2.2687	711.672	141.238	1061.32	91.6292	4.45227	771.457	930.727
2.2703	714.623	128.309	1063.15	95.7047	-1.01188	774.493	940.239
2.272	715.326	118.05	1059.5	95.7047	-0.8095	776.112	941.655
2.2737	713.78	116.926	1053.6	90.6454	4.85702	775.505	934.977
2.2753	712.375	125.779	1049.52	84.6024	9.71405	773.076	926.882
2.277	712.796	138.709	1050.64	81.9322	10.3212	769.231	923.037
2.2787	715.326	147	1056.97	84.1808	6.67841	767.207	925.668
2.2803	717.575	145.033	1064.7	89.8022	2.42851	768.017	932.346
2.282	717.856	133.649	1067.93	94.5805	1.61901	770.243	937.608
2.2837	717.153	121.423	1064.98	94.5805	4.45227	771.457	937.001
2.2853	716.591	118.05	1059.08	89.0996	8.29741	770.85	931.537
2.287	716.169	125.077	1054.16	81.6512	9.10692	769.636	925.668
2.2887	714.904	135.757	1053.45	79.1215	6.47603	768.017	924.049
2.2903	713.077	141.8	1058.65	84.3213	3.23801	768.219	928.906
2.292	712.094	139.833	1066.81	94.2994	1.61901	771.255	936.596
2.2937	713.499	132.525	1072.85	101.045	3.44039	775.1	941.251
2.2953	717.575	126.623	1073.55	98.7965	8.70217	776.314	939.632
2.297	722.072	126.482	1069.9	89.3806	14.5711	773.886	933.763
2.2987	723.899	131.26	1066.1	80.2458	15.7853	769.231	927.894
2.3003	722.493	137.584	1066.24	78.6999	10.3212	765.588	926.275
2.302	720.104	140.957	1071.72	86.1483	1.82138	765.588	930.12
2.3037	718.699	139.833	1079.88	96.829	-3.44039	769.838	936.596
2.3053	720.104	135.336	1085.78	102.45	-2.42851	777.124	941.251
2.307	723.899	132.525	1086.48	98.656	3.23801	781.374	939.834
2.3087	727.553	135.055	1083.11	87.6942	9.10692	778.743	932.346
2.3103	728.396	141.66	1078.47	78.6999	11.5354	769.231	924.656
2.312	726.007	148.406	1076.22	77.9972	8.29741	760.124	923.644
2.3137	722.072	150.233	1077.91	86.4294	1.61901	757.493	930.12
2.3153	719.823	145.314	1081.98	96.9695	-5.26178	763.969	939.834
2.317	721.229	136.882	1086.2	102.169	-7.89266	775.505	946.715
2.3187	726.007	131.682	1089.01	98.3749	-4.2499	784.207	945.501
2.3203	730.644	134.774	1090.13	88.2563	2.22614	784.612	937.001
2.322	732.05	145.876	1089.43	79.4026	8.09504	777.124	928.501
2.3237	729.801	157.259	1087.32	78.4188	9.71405	767.005	926.275
2.3253	726.85	159.227	1086.2	86.851	6.67841	762.35	931.132
2.327	725.304	149.53	1088.03	97.5316	1.61901	767.207	938.215
2.3287	725.304	135.055	1093.23	102.731	-1.01188	777.326	941.858
2.3303	727.272	126.904	1098.29	99.3586	0.8095	783.195	939.025
2.332	730.504	131.401	1099.97	89.0996	5.46415	780.362	932.144
2.3337	731.769	145.033	1098	79.1215	8.09504	770.85	926.882
2.3353	729.801	158.384	1094.77	77.5756	6.67841	763.969	927.489
2.337	726.569	162.459	1093.51	85.4456	2.42851	766.195	932.346
2.3387	725.726	154.027	1095.76	96.4074	-0.40475	774.493	937.001
2.3403	727.974	139.552	1100.67	101.326	1.61901	781.981	937.406
2.342	731.347	130.698	1105.03	95.7047	7.48791	781.576	933.763
2.3437	732.05	135.898	1105.73	83.0565	12.3449	774.695	927.894
2.3453	729.52	152.481	1103.49	73.219	11.9402	767.005	924.656
2.347	725.726	168.362	1101.66	73.7812	6.47603	764.981	926.477
2.3487	723.477	171.734	1102.92	82.7755	-0.8095	769.231	933.763
2.3503	724.742	161.054	1107	93.1751	-3.64277	776.719	941.655
2.352	729.942	144.33	1110.93	96.5479	0.60713	782.588	944.489
2.3537	735.704	134.633	1112.9	91.3481	9.71405	783.6	940.644
2.3553	736.969	138.849	1111.64	81.9322	16.7972	778.338	933.763
2.357	732.471	154.73	1108.12	75.7487	16.1901	771.255	929.108
2.3587	726.569	170.61	1106.44	78.6999	8.09504	769.231	930.12
2.3603	724.18	175.529	1109.95	88.678	-2.63089	774.493	937.001
2.362	726.85	166.956	1117.26	96.4074	-8.90454	781.374	944.489
2.3637	732.471	151.357	1122.88	95.4236	-5.8689	782.588	945.096
2.3653	737.671	140.676	1123.58	87.132	3.84514	776.112	937.406
2.367	739.076	143.206	1120.91	78.6999	12.3449	768.017	927.489
2.3687	735.423	156.838	1117.26	76.873	11.3331	765.386	922.632
2.3703	729.801	172.016	1115.15	83.0565	1.61901	769.838	927.287
2.372	726.147	178.34	1116.27	92.7535	-8.90454	777.731	938.013
2.3737	727.693	172.859	1120.21	99.0775	-10.1188	783.195	947.524
2.3753	732.471	161.054	1124.71	97.2506	-1.01188	780.969	947.727
2.377	736.547	152.2	1127.38	87.6942	11.9402	772.874	939.632
2.3787	737.671	152.481	1127.38	76.873	20.44	765.588	929.918
2.3803	736.828	160.211	1125.55	72.6569	20.0352	765.993	925.263
2.382	736.406	169.908	1124.99	78.6999	13.3568	772.874	929.108
2.3837	737.25	175.107	1127.8	91.3481	5.46415	780.564	939.025
2.3853	738.374	172.578	1132.58	101.045	1.21426	782.588	947.524
2.387	738.374	166.113	1135.81	101.326	1.61901	777.731	948.334
2.3887	737.952	162.178	1134.82	92.4724	4.45227	771.457	941.251
2.3903	737.671	164.286	1131.45	81.3701	6.47603	770.243	931.739
2.392	738.655	169.205	1129.48	76.0297	6.07128	775.1	927.894
2.3937	740.201	172.016	1132.15	80.1053	4.04752	781.576	932.144
2.3953	741.325	168.783	1137.21	90.6454	2.42851	783.6	941.251
2.397	740.622	161.475	1140.31	99.9208	2.22614	779.35	947.524
2.3987	738.655	156.557	1139.18	101.748	2.83326	773.076	946.108
2.4003	737.531	159.789	1135.39	94.5805	3.84514	770.85	939.227
2.402	739.076	170.329	1132.58	83.8997	2.42851	775.707	932.751
2.4037	742.871	182.134	1133.98	76.873	-1.01188	784.814	930.727
2.4053	747.368	186.912	1138.9	79.4026	-3.64277	791.695	933.763
2.407	749.898	181.01	1144.66	89.5211	-2.63089	789.671	940.644
2.4087	748.633	169.205	1147.33	99.0775	2.42851	780.362	948.131
2.4103	743.855	160.632	1146.49	100.202	9.71405	772.469	950.762
2.412	739.779	161.335	1144.38	92.3318	14.1663	772.874	946.108
2.4137	740.622	170.329	1143.96	81.2296	12.3449	780.969	936.596
2.4153	746.103	181.853	1146.49	74.6244	4.45227	789.671	928.501
2.417	752.006	188.037	1151.69	76.5919	-3.64277	790.683	927.894
2.4187	753.833	184.804	1156.33	84.6024	-6.27365	782.588	936.394
2.4203	750.6	175.107	1158.01	92.3318	-1.01188	771.862	948.334
2.422	744.979	166.816	1157.03	94.1588	9.10692	767.005	955.619
2.4237	741.747	165.551	1156.61	90.0833	15.7853	772.064	951.977
2.4253	743.574	171.453	1158.44	84.3213	13.3568	783.195	939.632
2.427	749.195	180.307	1161.39	82.0728	3.44039	792.1	928.906
2.4287	754.957	186.631	1163.35	85.024	-5.66653	790.481	929.918
2.4303	757.346	186.21	1163.35	90.6454	-7.69029	779.552	942.87
2.432	755.8	179.464	1162.65	94.5805	-2.63089	768.219	958.453
2.4337	751.303	172.016	1163.63	93.5966	4.45227	765.386	964.119
2.4353	747.228	170.61	1166.16	88.8185	7.08316	772.874	955.012
2.437	747.649	176.513	1169.54	84.6024	4.45227	783.802	938.215
2.4387	752.849	185.366	1172.49	83.4781	0.60713	788.457	926.882
2.4403	758.752	190.566	1173.19	85.7267	0.60713	782.588	929.513
2.442	761.422	189.161	1172.91	89.0996	5.46415	772.469	943.882
2.4437	759.595	182.837	1172.63	91.6292	11.5354	766.195	959.06
2.4453	755.8	176.934	1172.63	91.2076	12.9521	768.017	964.119
2.447	753.833	176.653	1173.19	89.0996	8.70217	774.493	954.607
2.4487	754.957	183.258	1175.44	87.6942	0.8095	781.374	938.013
2.4503	757.908	192.393	1177.83	87.9753	-6.67841	783.6	926.275
2.452	760.86	198.015	1178.81	89.0996	-7.89266	780.969	927.894
2.4537	762.827	196.188	1177.41	89.5211	-2.02376	778.338	940.846
2.4553	762.124	188.739	1175.86	88.3969	7.48791	779.35	954
2.457	758.47	181.291	1175.86	86.1483	13.5592	783.802	957.441
2.4587	755.098	178.902	1179.23	83.4781	12.9521	787.445	949.953
2.4603	755.8	183.539	1183.73	82.4944	6.47603	787.85	938.215
2.462	760.578	190.566	1186.96	84.6024	-1.82138	785.826	931.739
2.4637	766.2	194.642	1187.38	87.6942	-5.26178	783.195	936.596
2.4653	769.151	193.236	1185.56	89.5211	-3.03564	782.588	949.346
2.467	768.308	188.037	1183.73	87.5537	1.61901	785.219	960.881
2.4687	764.654	183.961	1184.43	82.7755	3.44039	789.064	961.691
2.4703	761.281	185.085	1188.51	78.6999	2.83326	791.088	951.572
2.472	760.578	190.285	1194.13	78.2783	0.8095	788.052	937.406
2.4737	763.108	195.485	1197.36	81.3701	1.21426	781.576	930.727
2.4753	766.481	198.015	1195.96	85.4456	3.84514	775.707	936.596
2.477	768.308	197.031	1191.04	87.5537	7.48791	774.695	949.143
2.4787	768.027	194.08	1187.1	86.851	8.29741	777.326	959.464
2.4803	767.184	191.691	1188.09	84.3213	5.0594	780.564	960.881
2.482	766.903	192.955	1193.99	82.4944	-1.01188	783.195	951.977
2.4837	768.308	197.593	1201.16	81.9322	-4.2499	783.802	939.025
2.4853	771.259	200.685	1206.22	81.9322	-1.82138	782.588	933.358
2.487	774.773	199.842	1206.22	82.4944	5.46415	782.183	939.834
2.4887	776.881	196.188	1202.14	84.6024	11.3331	784.207	953.191
2.4903	775.475	193.236	1198.49	87.2726	12.5473	786.433	962.095
2.492	771.681	193.939	1198.21	87.9753	7.69029	784.814	959.464
2.4937	768.308	198.015	1201.16	85.7267	-1.01188	780.564	948.131
2.4953	768.027	204.058	1205.09	81.2296	-7.69029	778.743	935.787
2.497	771.681	207.993	1208.47	76.873	-6.88078	780.969	931.132
2.4987	776.599	205.463	1210.71	75.7487	-0.8095	784.814	937.406
2.5003	780.253	197.734	1210.85	78.2783	6.67841	786.838	950.358
2.502	780.253	190.707	1209.17	83.4781	10.9283	784.814	961.083
2.5037	776.459	190.988	1207.06	87.6942	10.7259	780.564	961.488
2.5053	772.524	198.155	1207.06	87.132	6.47603	778.945	950.358
2.507	772.102	207.29	1209.17	81.3701	2.22614	781.374	936.394
2.5087	775.054	212.209	1212.12	74.9055	0.8095	784.612	931.537
2.5103	779.41	209.539	1214.93	70.9705	1.82138	786.231	938.62
2.512	782.783	201.809	1217.88	72.3758	2.83326	784.612	951.977
2.5137	783.486	195.063	1219.71	77.9972	3.44039	780.564	962.5
2.5153	780.253	194.08	1220.27	83.6187	2.83326	777.933	961.691
2.517	775.475	199.56	1220.27	85.024	1.21426	779.552	949.143
2.5187	773.227	207.43	1220.83	81.2296	0.60713	785.826	933.763
2.5203	776.881	212.209	1222.66	75.7487	2.42851	791.088	929.108
2.522	783.907	211.084	1224.35	73.219	6.07128	790.683	939.834
2.5237	789.529	205.463	1225.19	75.046	8.29741	784.207	959.06
2.5253	789.95	199.56	1225.47	78.2783	7.48791	776.719	972.214
2.527	784.751	198.155	1225.19	80.1053	2.42851	774.493	969.988
2.5287	778.145	202.933	1224.77	80.1053	-3.44039	780.564	954.203
2.5303	776.459	211.084	1225.19	77.9972	-6.27365	791.088	937.001
2.532	782.221	216.565	1227.16	74.9055	-2.63089	796.957	930.727
2.5337	791.777	215.582	1230.39	72.7974	6.07128	792.302	939.632
2.5353	797.961	209.257	1233.62	74.6244	14.5711	781.374	955.822
2.537	796.134	202.793	1234.89	79.1215	15.7853	773.481	967.56
2.5387	788.405	201.669	1234.46	81.9322	8.29741	775.1	965.941
2.5403	780.534	206.868	1233.06	80.2458	-2.02376	783.802	951.977
2.542	778.145	214.457	1231.79	75.3271	-7.89266	790.481	936.596
2.5437	783.907	219.517	1231.79	72.0947	-5.26178	788.457	932.751
2.5453	792.902	218.111	1234.75	73.5001	3.44039	780.564	943.882
2.547	797.961	212.209	1238.96	78.4188	11.5354	775.1	961.488
2.5487	794.729	206.306	1241.49	82.4944	13.9639	777.731	972.821
2.5503	786.859	205.182	1240.51	81.9322	8.70217	786.231	970.595
2.552	780.675	210.241	1238.96	76.1703	0.60713	793.719	958.25
2.5537	781.799	218.111	1239.38	68.7219	-4.2499	793.719	945.501
2.5553	789.248	223.592	1242.19	64.9274	-2.02376	785.421	941.858
2.557	797.68	222.468	1246.41	68.0192	5.46415	776.112	949.143
2.5587	800.35	216.284	1249.36	76.0297	10.3212	773.886	961.083
2.5603	796.275	210.663	1249.36	81.9322	7.48791	781.374	969.178
2.562	789.248	209.96	1248.1	81.6512	-0.8095	793.314	967.964
2.5637	785.453	215.16	1248.1	75.046	-6.27365	802.421	957.846
2.5653	787.702	222.187	1249.78	66.0517	-4.04752	802.825	945.703
2.567	794.729	226.262	1252.59	60.4303	5.46415	793.719	940.239
2.5687	802.458	224.857	1254.56	62.3978	14.9758	781.981	944.489
2.5703	806.534	219.938	1255.26	70.9705	17.4043	776.719	955.619
2.572	805.55	215.441	1254.42	80.5269	11.5354	781.576	965.738
2.5737	800.631	215.16	1253.3	85.024	0.60713	793.111	968.369
2.5753	794.729	219.235	1252.73	82.0728	-7.89266	802.825	961.083
2.577	792.199	224.295	1253.44	75.046	-6.67841	803.028	949.75
2.5787	795.431	226.262	1255.54	68.3003	4.45227	792.707	942.87
2.5803	802.036	224.435	1258.21	65.7707	16.7972	779.552	945.501
2.582	806.534	219.938	1260.04	68.0192	20.0352	774.088	955.619
2.5837	805.409	216.706	1260.89	73.9217	10.3212	778.945	965.333
2.5853	799.507	217.971	1262.01	80.1053	-6.27365	789.064	968.571
2.587	793.183	222.608	1263.7	82.7755	-16.7972	796.349	963.31
2.5887	791.777	227.808	1264.82	80.5269	-12.7497	796.349	955.012
2.5903	797.399	229.635	1265.52	75.3271	2.22614	790.683	949.346
2.592	806.674	227.246	1266.37	71.2515	17.202	786.838	951.369
2.5937	812.155	221.484	1267.77	70.2678	19.8328	787.445	958.857
2.5953	810.188	217.408	1268.9	72.7974	9.10692	791.695	964.726
2.597	802.177	218.392	1270.02	76.5919	-5.8689	795.338	963.714
2.5987	795.572	224.435	1270.44	77.5756	-12.5473	794.933	956.226
2.6003	797.258	232.867	1269.74	74.6244	-5.26178	791.695	948.334
2.602	806.534	237.646	1268.61	70.2678	9.30929	787.85	947.727
2.6037	815.528	235.397	1269.04	67.8787	20.0352	786.838	955.619
2.6053	817.636	227.387	1271.57	68.5814	19.4281	791.088	966.952
2.607	812.436	220.641	1274.94	72.3758	8.29741	796.349	973.428
2.6087	804.285	221.484	1276.48	76.5919	-4.65465	798.171	970.19
2.6103	798.523	229.916	1275.92	77.9972	-10.5236	794.73	959.06
2.612	799.647	239.613	1274.8	74.3433	-5.0594	786.433	949.75
2.6137	806.955	244.672	1276.06	67.8787	8.09504	779.35	950.965
2.6153	815.528	241.721	1279.44	62.3978	19.2257	779.552	962.5
2.617	819.463	233.008	1282.95	62.3978	19.4281	787.242	975.047
2.6187	816.512	225.56	1284.21	67.5976	8.09504	796.349	978.083
2.6203	809.906	224.857	1282.95	73.219	-6.67841	799.79	968.976
2.622	804.988	230.759	1280.84	72.6569	-13.1544	795.945	954.203
2.6237	805.409	238.208	1280.56	65.068	-6.88078	787.242	944.084
2.6253	810.75	242.283	1283.51	56.3548	7.69029	779.552	945.703
2.627	817.636	240.597	1288.99	52.8414	20.44	777.933	958.25
2.6287	820.728	234.694	1293.49	57.198	22.6661	783.195	972.619
2.6303	818.901	229.495	1293.77	66.1923	12.9521	791.695	977.678
2.632	814.404	229.214	1290.54	71.6731	-1.82138	799.183	969.178
2.6337	811.031	234.132	1287.87	69.003	-11.1307	801.206	953.191
2.6353	811.733	240.316	1287.59	60.4303	-8.49979	796.957	941.858
2.637	816.231	243.689	1290.82	52.8414	4.04752	788.862	943.477
2.6387	822.414	242.845	1296.44	52.7008	17.202	782.588	956.834
2.6403	825.928	238.489	1301.22	60.1492	20.44	783.802	970.798
2.642	824.663	233.711	1302.62	71.3921	11.9402	792.707	974.238
2.6437	820.025	233.289	1300.09	78.2783	-1.01188	803.433	964.726
2.6453	816.231	237.786	1296.02	75.4676	-8.49979	806.671	951.572
2.647	816.231	243.97	1293.91	64.5058	-5.0594	799.79	946.512
2.6487	819.182	246.218	1296.44	52.4198	5.66653	789.064	952.381
2.6503	822.414	243.267	1302.06	48.6253	14.1663	782.993	963.714
2.652	822.976	238.067	1307.4	56.4953	14.5711	786.231	972.821
2.6537	820.587	235.116	1308.95	70.9705	7.48791	795.945	973.428
2.6553	817.636	237.646	1305.72	80.1053	0.20238	804.444	965.738
2.657	817.636	244.391	1300.52	76.5919	-1.82138	803.028	955.215
2.6587	821.43	251.137	1298.69	64.5058	2.22614	793.719	948.131
2.6603	825.928	253.245	1303.05	53.544	8.29741	783.195	949.143
2.662	827.614	250.434	1310.21	51.9982	10.9283	778.945	958.453
2.6637	825.928	245.094	1314.57	59.1655	9.10692	783.195	969.583
2.6653	822.555	240.737	1313.73	69.1435	3.84514	793.314	973.226
2.667	821.009	240.035	1310.07	75.4676	-0.20238	803.433	966.345
2.6687	822.976	242.986	1307.96	74.6244	0.20238	805.456	955.012
2.6703	827.052	247.343	1309.65	66.1923	3.84514	796.957	948.334
2.672	830.003	250.013	1313.73	55.7926	7.48791	784.207	951.977
2.6737	830.003	250.715	1317.1	50.5928	8.29741	778.338	962.5
2.6753	828.457	249.591	1317.94	53.1224	6.67841	783.6	971.607
2.677	826.63	247.764	1316.12	59.8681	4.45227	794.933	972.214
2.6787	826.911	246.64	1313.87	63.241	4.45227	803.028	964.929
2.6803	829.3	247.483	1314.57	59.0249	7.08316	802.421	956.834
2.682	832.814	250.013	1318.36	49.8901	9.71405	794.326	955.619
2.6837	835.203	251.84	1323.14	44.6903	9.91642	786.231	962.5
2.6853	835.484	251.84	1326.09	49.0469	6.47603	783.802	971.809
2.687	834.36	251.137	1326.52	59.7276	1.82138	789.469	974.845
2.6887	832.954	251.137	1326.09	68.3003	1.21426	797.159	969.583
2.6903	832.252	252.261	1326.37	67.8787	7.08316	800.599	960.476
2.692	832.954	253.245	1327.5	57.4791	14.1663	795.54	954.607
2.6937	835.203	253.948	1329.75	45.8146	15.1782	787.242	957.846
2.6953	837.451	254.088	1332.28	43.8471	9.30929	782.183	969.178
2.697	839.138	252.964	1334.24	53.8251	1.82138	786.433	981.928
2.6987	839.138	251.559	1333.82	67.8787	-2.42851	796.957	985.976
2.7003	838.857	251.84	1331.29	74.6244	-0.8095	805.659	978.69
2.702	839.138	253.948	1330.45	69.4246	5.66653	804.444	964.321
2.7037	839.841	256.899	1333.12	56.4953	11.5354	793.719	953.191
2.7053	839.841	258.866	1337.48	45.8146	11.3331	782.588	954.607
2.707	838.435	259.148	1340.85	45.8146	5.0594	780.564	965.941
2.7087	837.451	257.742	1341.69	56.7764	-0.8095	790.683	977.678
2.7103	838.154	255.494	1339.87	69.1435	0.20238	805.659	980.714
2.712	840.262	253.667	1336.49	73.0785	6.47603	813.956	972.821
2.7137	841.808	254.088	1334.67	65.349	12.3449	808.897	959.464
2.7153	841.808	256.618	1336.35	52.2792	12.5473	794.73	950.762
2.717	841.105	258.866	1341.55	44.2687	6.07128	781.576	952.584
2.7187	840.262	260.272	1346.89	48.3442	-2.02376	778.743	964.119
2.7203	839.841	260.693	1349.14	61.5546	-4.65465	787.242	975.857
2.722	841.105	260.272	1347.17	72.7974	2.22614	800.195	979.702
2.7237	844.057	259.71	1344.22	73.5001	14.9758	807.278	974.238
2.7253	847.711	259.569	1343.52	63.9437	25.7018	803.433	963.31
2.727	849.959	259.991	1346.47	52.2792	25.0946	791.695	955.619
2.7287	849.537	261.396	1351.25	47.2199	11.3331	782.183	956.226
2.7303	846.165	262.52	1354.2	52.8414	-5.66653	782.183	964.726
2.732	842.511	262.239	1353.5	65.349	-11.7378	789.671	975.857
2.7337	840.965	261.115	1350.83	74.3433	-1.41663	798.576	981.321
2.7353	843.916	260.272	1349.7	73.5001	17.8091	802.218	976.667
2.737	849.537	260.272	1352.09	63.5221	31.5707	799.79	965.941
2.7387	855.159	262.099	1357.57	52.7008	29.9517	794.933	958.25
2.7403	857.689	265.191	1362.77	49.328	15.583	791.29	958.857
2.742	856.002	266.737	1364.32	56.0737	0.20238	792.1	965.738
2.7437	851.083	265.191	1360.95	69.003	-4.04752	794.326	972.214
2.7453	846.165	262.099	1355.61	77.9972	5.0594	793.921	974.238
2.747	844.759	259.991	1353.22	76.873	19.4281	790.683	969.988
2.7487	847.851	261.396	1356.73	66.4733	28.3326	787.85	962.703
2.7503	852.489	265.472	1362.49	55.371	24.2851	786.838	957.846
2.752	854.316	269.688	1366.85	50.8739	9.91642	789.671	959.869
2.7537	851.505	271.515	1367.69	55.6521	-4.65465	796.552	968.369
2.7553	847.289	268.985	1366.01	66.0517	-8.29741	804.04	977.678
2.757	844.478	265.191	1363.48	73.9217	2.42851	806.671	980.916
2.7587	845.462	263.785	1362.77	72.7974	19.8328	801.814	974.845
2.7603	848.554	266.315	1364.88	63.8032	29.9517	793.314	963.714
2.762	851.083	270.25	1367.97	54.6683	25.0946	788.457	957.238
2.7637	851.786	272.217	1369.8	53.4035	8.29741	791.29	959.464
2.7653	850.381	272.217	1369.52	60.1492	-7.89266	798.778	968.369
2.767	848.835	270.25	1367.13	69.4246	-12.1426	805.456	977.476
2.7687	847.289	267.299	1364.88	74.3433	-1.41663	807.075	982.535
2.7703	846.165	266.315	1364.6	72.3758	16.5948	803.433	982.333
2.772	845.602	269.266	1366.85	66.1923	27.9279	797.564	977.071
2.7737	845.884	273.061	1371.21	60.8519	23.678	793.111	971.607
2.7753	845.884	275.169	1374.72	59.8681	7.08316	792.707	969.988
2.777	845.181	275.169	1375.28	63.241	-9.51167	796.349	974.238
2.7787	846.305	274.044	1373.03	66.1923	-12.7497	799.587	980.107
2.7803	850.662	273.061	1371.63	66.1923	-0.40475	800.802	982.333
2.782	856.002	273.342	1372.75	65.349	17.8091	799.183	978.083
2.7837	858.532	274.888	1375.7	65.349	26.7136	795.54	970.595
2.7853	856.986	276.574	1377.95	66.7544	19.2257	791.695	965.941
2.787	852.629	277.136	1378.23	68.3003	2.83326	790.076	967.357
2.7887	849.256	276.574	1375.84	69.003	-9.51167	792.707	973.428
2.7903	849.256	274.888	1373.17	67.8787	-9.51167	799.183	980.309
2.792	852.629	273.061	1373.03	65.068	3.44039	805.456	981.726
2.7937	857.689	273.061	1376.97	63.8032	19.8328	806.064	975.452
2.7953	860.78	275.45	1384.27	65.349	26.7136	799.587	966.345
2.797	859.937	278.541	1390.88	68.7219	18.2138	788.457	961.691
2.7987	856.002	281.212	1392.85	70.9705	1.82138	779.552	967.357
2.8003	851.786	282.195	1390.18	71.2515	-8.29741	779.957	978.69
2.802	848.835	280.79	1387.23	69.8462	-3.44039	791.29	987.595
2.8037	848.835	278.541	1388.63	67.8787	13.9639	805.659	986.583
2.8053	853.191	278.541	1394.96	65.349	29.9517	812.539	977.071
2.807	859.515	282.195	1403.11	64.6464	31.5707	806.064	966.75
2.8087	863.732	286.974	1408.45	66.8949	16.7972	791.695	963.107
2.8103	862.607	289.222	1409.43	70.9705	-4.65465	780.564	969.178
2.812	857.408	288.098	1407.6	73.0785	-17.6067	780.969	980.916
2.8137	851.505	285.147	1405.78	71.3921	-12.1426	791.29	989.821
2.8153	849.537	282.195	1406.48	68.5814	9.71405	803.837	989.821
2.817	852.208	281.914	1410.98	67.176	34.2015	808.897	983.345
2.8187	856.986	284.163	1417.3	68.3003	42.2966	804.04	975.857
2.8203	859.937	286.974	1422.36	71.2515	26.7136	794.933	972.619
2.822	860.64	288.52	1424.33	73.9217	-1.82138	790.076	974.238
2.8237	859.937	288.941	1424.33	75.046	-20.2376	792.1	978.69
2.8253	859.515	288.941	1423.63	74.3433	-15.7853	796.552	981.928
2.827	860.078	289.222	1423.48	73.219	7.48791	798.576	982.333
2.8287	862.607	289.925	1424.33	73.219	31.1659	796.552	980.714
2.8303	865.559	290.628	1426.86	75.046	37.6419	793.111	979.297
2.832	866.542	290.065	1431.07	77.8567	22.6661	791.088	980.916
2.8337	864.434	289.363	1435.01	78.2783	-1.01188	793.111	985.571
2.8353	860.78	289.644	1436.13	75.7487	-15.9877	797.564	988.809
2.837	858.813	290.768	1434.02	72.3758	-12.5473	800.802	987.19
2.8387	861.483	291.19	1431.64	71.2515	5.46415	799.183	981.726
2.8403	867.807	290.346	1431.78	73.219	24.2851	791.695	976.059
2.842	873.429	289.644	1436.27	77.154	30.9635	783.802	974.44
2.8437	875.537	291.471	1442.88	80.1053	21.4519	783.802	977.678
2.8453	873.288	294.844	1445.83	78.6999	3.84514	794.326	983.547
2.847	868.51	297.373	1441.33	73.0785	-6.67841	808.29	989.821
2.8487	864.715	296.389	1432.2	66.7544	-2.63089	816.182	992.047
2.8503	864.434	292.314	1423.91	64.9274	11.5354	811.932	989.214
2.852	868.51	288.52	1421.38	68.7219	24.6899	798.576	982.535
2.8537	874.412	288.238	1425.03	74.3433	26.7136	787.242	976.667
2.8553	877.504	292.173	1432.2	77.8567	17.202	785.826	975.047
2.857	875.818	298.638	1437.68	77.5756	3.84514	795.338	979.297
2.8587	870.618	304.4	1438.66	76.0297	-1.82138	808.087	985.976
2.8603	866.683	304.119	1435.85	74.2028	5.46415	814.563	989.214
2.862	868.088	298.076	1433.18	72.6569	20.8447	809.909	986.583
2.8637	873.429	290.346	1433.32	71.9542	32.7849	797.968	981.321
2.8653	878.628	287.676	1437.26	72.7974	32.5825	788.052	978.488
2.867	880.455	291.892	1442.88	75.7487	20.0352	788.052	979.702
2.8687	878.909	299.903	1448.5	79.1215	4.85702	796.349	983.547
2.8703	875.255	305.946	1452.01	81.9322	-0.8095	804.647	988.404
2.872	873.288	307.351	1452.44	82.3538	7.69029	806.468	990.428
2.8737	875.115	304.119	1451.31	80.6674	22.059	800.599	986.178
2.8753	879.893	298.919	1451.31	77.9972	29.5469	793.111	978.083
2.877	883.407	295.265	1452.58	76.5919	24.0827	790.683	972.619
2.8787	883.407	295.968	1455.11	77.8567	10.3212	795.54	974.44
2.8803	880.034	301.027	1458.06	81.6512	-1.41663	803.837	982.333
2.882	876.942	305.665	1461.29	85.3051	-2.63089	808.087	989.214
2.8837	877.082	306.368	1463.26	85.4456	9.10692	805.052	990.023
2.8853	881.439	303.276	1463.68	81.9322	25.7018	797.968	984.559
2.887	886.639	299.903	1464.66	77.2946	33.1897	793.921	977.071
2.8887	888.607	299.341	1467.33	76.0297	24.2851	796.957	973.833
2.8903	885.515	302.995	1471.41	78.4188	6.67841	804.444	977.476
2.892	879.331	307.492	1474.64	83.0565	-4.2499	809.706	985.571
2.8937	874.834	308.897	1475.9	86.5699	-1.41663	808.29	991.035
2.8953	876.239	306.649	1477.03	87.2726	11.9402	802.218	989.821
2.897	883.266	303.978	1479.84	84.6024	25.0946	796.552	983.952
2.8987	892.541	302.995	1484.48	80.5269	28.3326	796.349	979.095
2.9003	897.319	306.227	1489.54	77.5756	19.8328	801.409	978.488
2.902	894.509	311.567	1491.79	77.5756	8.70217	806.671	981.321
2.9037	886.639	315.502	1491.36	80.5269	5.0594	807.075	984.964
2.9053	879.893	313.254	1491.36	84.6024	12.5473	802.421	986.785
2.907	878.909	306.227	1493.33	86.851	24.6899	796.552	985.571
2.9087	883.969	300.324	1496.7	85.024	31.1659	795.338	982.535
2.9103	891.136	301.027	1500.36	78.2783	26.7136	799.587	981.321
2.912	895.211	307.773	1502.47	70.2678	14.1663	806.671	982.94
2.9137	893.244	314.8	1502.89	67.5976	2.83326	811.528	986.178
2.9153	885.936	317.048	1502.89	72.7974	0.8095	811.528	988.809
2.917	880.315	314.519	1503.59	83.4781	9.10692	807.075	989.416
2.9187	881.158	309.6	1505.42	92.4724	19.4281	801.814	988.404
2.9203	889.73	305.946	1507.1	95.002	24.0827	800.195	987.19
2.922	901.395	306.649	1508.79	90.2239	17.8091	803.837	985.976
2.9237	908.562	310.443	1509.91	82.0728	6.07128	808.29	984.559
2.9253	904.768	312.692	1510.62	74.9055	-0.8095	810.921	984.964
2.927	891.136	311.848	1511.46	72.7974	4.45227	810.921	987.19
2.9287	878.207	309.6	1513.29	77.5756	18.821	808.29	989.416
2.9303	875.958	309.319	1516.38	86.1483	30.5588	803.028	990.023
2.932	885.936	311.146	1519.33	92.894	29.9517	798.171	988.404
2.9337	900.411	314.378	1522.14	94.2994	16.1901	796.349	986.178
2.9353	908.562	316.346	1523.69	90.5049	-0.40475	799.587	985.166
2.937	906.314	315.502	1523.97	83.8997	-7.28554	807.682	986.785
2.9387	897.319	311.848	1522.28	77.8567	0.8095	817.801	989.821
2.9403	888.607	308.195	1519.89	76.0297	17.4043	822.254	991.44
2.942	886.639	307.351	1518.49	80.1053	28.3326	814.159	989.821
2.9437	891.558	310.443	1519.19	87.5537	25.0946	797.159	986.785
2.9453	899.708	315.221	1521.72	93.5966	10.9283	782.183	984.559
2.947	905.892	318.454	1524.81	94.5805	-1.41663	778.743	984.154
2.9487	905.47	317.891	1527.76	90.6454	-2.42851	792.707	987.595
2.9503	899.569	314.8	1529.17	85.024	8.29741	818.813	993.464
2.952	894.088	312.27	1529.73	80.5269	22.4637	839.051	996.904
2.9537	893.806	312.27	1530.99	79.4026	28.9398	834.801	994.273
2.9553	898.584	314.8	1532.68	81.3701	24.0827	806.468	986.785
2.957	904.768	317.891	1534.79	84.1808	12.3449	772.874	979.297
2.9587	908.141	320.702	1536.76	85.4456	3.44039	760.327	979.095
2.9603	907.438	321.405	1540.27	85.024	5.0594	779.957	985.976
2.962	903.784	319.578	1544.06	84.6024	15.583	819.42	994.273
2.9637	901.395	317.47	1547.72	86.4294	25.9041	849.979	997.916
2.9653	902.66	317.47	1551.09	90.5049	28.3326	847.753	995.69
2.967	906.736	320.421	1554.18	93.4561	21.0471	812.539	990.428
2.9687	909.546	324.075	1556.29	91.6292	9.91642	768.826	986.178
2.9703	908.562	326.745	1557.41	85.7267	3.84514	751.22	985.571
2.972	905.47	327.026	1558.54	80.5269	7.48791	775.505	988.809
2.9737	903.081	324.216	1560.08	80.2458	17.202	825.694	993.666
2.9753	903.784	320.421	1562.33	86.1483	25.0946	863.134	995.892
2.977	908.984	319.578	1565.85	94.721	24.6899	857.265	994.071
2.9787	915.87	322.67	1569.22	101.045	16.7972	811.932	989.416
2.9803	918.962	327.729	1571.47	100.483	7.69029	761.743	986.178
2.982	916.011	330.821	1572.31	92.894	4.04752	743.125	986.178
2.9837	909.968	330.821	1572.73	83.0565	10.7259	767.207	989.821
2.9853	906.314	328.853	1573.86	77.5756	22.4637	817.194	995.69
2.987	908.562	326.745	1575.68	81.2296	29.1421	857.265	999.333
2.9887	915.308	326.324	1578.64	91.3481	25.297	859.086	997.714
2.9903	922.335	327.448	1582.71	100.905	12.5473	823.67	992.452
2.992	924.865	328.994	1587.49	103.575	1.21426	778.338	987.19
2.9937	921.21	329.977	1591.56	99.3586	0.60713	755.47	984.559
2.9953	915.308	329.977	1593.67	90.6454	13.5592	769.636	987.595
2.997	911.935	328.994	1594.52	83.6187	31.1659	807.278	995.083
2.9987	913.34	327.167	1595.22	82.7755	41.6895	841.884	1002.57
3.0003	918.821	325.621	1596.34	88.8185	38.4514	849.979	1004.39
3.002	924.865	326.324	1598.59	97.5316	24.6899	827.92	998.928
3.0037	927.535	329.696	1600.84	101.326	10.7259	793.719	989.214
3.0053	925.567	334.053	1601.54	97.2506	5.0594	773.076	982.333
3.007	921.07	337.004	1600.14	89.0996	11.5354	778.338	983.952
3.0087	917.135	337.004	1599.44	83.6187	25.297	801.814	992.047
3.0103	916.011	333.772	1602.67	85.3051	35.011	823.873	999.535
3.012	918.118	329.696	1609.69	93.1751	32.5825	828.932	1002.17
3.0137	922.897	327.87	1617.14	100.905	19.2257	814.766	999.535
3.0153	928.238	330.118	1620.8	102.169	5.46415	794.933	995.083
3.017	930.767	334.756	1618.69	96.4074	1.82138	783.802	992.654
3.0187	928.097	338.129	1613.49	88.2563	10.9283	788.457	993.059
3.0203	921.07	337.847	1610.82	84.7429	25.9041	804.04	994.678
3.022	913.762	334.756	1613.35	90.2239	35.8205	820.432	996.904
3.0237	910.389	331.102	1620.52	101.326	33.1897	825.694	998.928
3.0253	912.638	329.696	1628.53	109.477	21.6542	817.801	999.333
3.027	918.821	332.367	1633.73	107.229	10.3212	805.456	997.916
3.0287	925.286	336.723	1633.87	96.1264	6.67841	799.587	996.904
3.0303	930.065	338.831	1631.48	85.4456	11.9402	803.028	996.904
3.032	932.594	337.145	1629.65	84.1808	21.4519	811.528	996.904
3.0337	933.016	333.772	1631.48	93.4561	27.5231	818.004	995.69
3.0353	931.61	331.804	1636.82	106.526	26.7136	818.004	994.071
3.037	929.643	333.35	1642.72	114.396	19.4281	813.147	993.666
3.0387	928.518	337.707	1646.51	110.883	12.3449	808.29	994.273
3.0403	929.362	342.204	1647.08	98.3749	11.5354	806.671	995.892
3.042	932.172	345.155	1646.37	86.1483	18.821	808.694	998.523
3.0437	935.264	345.296	1647.08	83.1971	26.916	812.944	1001.15
3.0453	936.669	343.328	1649.75	91.2076	28.9398	816.789	1002.57
3.047	934.421	339.393	1653.4	103.856	22.4637	817.801	999.94
3.0487	930.486	336.723	1655.65	112.147	12.9521	813.551	994.273
3.0503	928.518	338.55	1655.79	110.18	7.48791	807.075	990.428
3.052	930.767	344.031	1655.23	99.0775	9.10692	802.825	991.845
3.0537	935.686	348.95	1655.23	87.5537	17.4043	805.052	998.928
3.0553	940.464	349.231	1656.91	85.024	28.3326	811.528	1006.82
3.057	941.588	344.453	1660.15	94.1588	33.7968	816.789	1010.26
3.0587	938.918	338.55	1663.52	109.196	29.9517	816.182	1006.82
3.0603	935.264	336.021	1664.92	120.158	19.4281	807.682	999.94
3.062	934.14	339.253	1664.5	119.034	11.5354	796.349	995.083
3.0637	936.248	345.718	1663.1	106.245	13.3568	791.088	995.69
3.0653	939.34	351.901	1661.97	90.5049	23.2732	797.159	999.535
3.067	940.464	353.728	1662.82	82.7755	32.7849	811.932	1002.17
3.0687	938.216	350.777	1666.75	88.678	33.7968	825.289	1001.56
3.0703	934.843	346.28	1671.67	103.434	26.3089	828.123	998.523
3.072	933.437	343.75	1675.04	114.255	17.8091	819.016	995.892
3.0737	935.966	345.296	1676.87	112.428	16.1901	804.647	994.678
3.0753	940.745	349.371	1677.29	99.4992	23.2732	794.73	995.285
3.077	944.539	353.025	1676.87	87.5537	33.392	795.54	998.321
3.0787	944.258	353.728	1677.15	87.132	37.4396	806.671	1001.15
3.0803	940.886	352.182	1678.42	99.3586	31.1659	819.42	1001.56
3.082	938.918	351.058	1680.24	114.677	18.821	823.873	998.523
3.0837	940.324	352.323	1681.37	121.423	9.71405	816.789	995.69
3.0853	943.836	355.555	1681.93	113.553	10.9283	803.433	995.083
3.087	946.366	357.382	1683.19	96.4074	23.0709	793.314	998.523
3.0887	946.366	356.398	1686.57	82.4944	37.4396	793.921	1004.19
3.0903	944.821	353.306	1691.35	83.6187	44.5227	804.647	1009.45
3.092	943.134	350.496	1695	101.045	39.0586	819.016	1010.26
3.0937	943.836	350.777	1696.12	123.531	23.0709	825.694	1006.01
3.0953	946.647	353.869	1695.84	135.055	7.48791	820.432	998.523
3.097	950.161	357.382	1696.55	126.904	3.44039	807.682	992.654
3.0987	953.112	359.63	1698.37	104.558	15.7853	798.576	994.071
3.1003	954.517	360.755	1700.2	84.3213	34.4039	800.802	1002.77
3.102	953.815	360.895	1701.6	81.6512	45.5346	812.944	1012.69
3.1037	950.723	360.333	1703.85	98.0938	41.2847	824.682	1015.52
3.1053	946.788	358.506	1707.23	120.861	27.5231	826.503	1010.06
3.107	945.945	356.82	1712	132.385	15.7853	816.182	1000.95
3.1087	949.036	357.944	1716.08	124.233	14.9758	800.802	996.702
3.1103	955.642	361.879	1717.91	103.856	23.678	791.29	999.94
3.112	961.545	364.128	1716.92	87.6942	33.7968	795.945	1007.02
3.1137	961.685	363.003	1714.53	88.8185	36.4277	812.539	1011.68
3.1153	955.22	359.63	1713.27	105.683	29.5469	828.932	1010.26
3.117	945.664	356.82	1716.08	124.936	18.2138	831.765	1004.39
3.1187	939.621	355.695	1723.25	131.822	12.3449	820.432	998.523
3.1203	941.447	357.382	1732.1	121.282	17.8091	804.04	997.714
3.122	950.723	360.474	1738.43	101.607	30.5588	795.338	1001.76
3.1237	962.247	363.003	1739.83	88.678	39.2609	800.195	1007.63
3.1253	969.695	362.582	1736.04	93.4561	36.4277	813.956	1010.26
3.127	970.398	359.63	1730.13	112.147	24.2851	824.682	1008.03
3.1287	964.917	356.82	1729.15	129.152	13.3568	824.682	1003.78
3.1303	957.75	357.804	1735.76	128.731	11.5354	815.778	1000.14
3.132	952.691	362.02	1746.15	110.883	21.4519	806.468	1000.55
3.1337	952.691	367.219	1754.02	90.0833	35.8205	803.837	1005.81
3.1353	956.485	369.608	1757.26	82.7755	44.3203	809.301	1012.28
3.137	961.545	367.219	1756.13	95.002	40.2728	818.004	1014.51
3.1387	964.495	363.284	1753.46	117.909	27.9279	823.265	1010.26
3.1403	964.074	361.598	1752.48	133.93	16.7972	821.646	1002.57
3.142	960.842	363.425	1755.71	132.103	14.9758	815.17	997.714
3.1437	957.89	366.095	1760.63	114.958	21.6542	808.694	999.333
3.1453	957.469	368.203	1763.86	95.7047	30.5588	807.075	1006.42
3.147	960.139	369.608	1763.86	88.2563	34.2015	812.944	1014.92
3.1487	964.074	369.749	1763.16	97.2506	30.154	822.051	1018.76
3.1503	966.744	368.625	1763.86	116.223	21.6542	826.503	1015.32
3.152	966.463	366.657	1766.81	131.26	16.1901	822.051	1006.42
3.1537	964.495	364.409	1771.31	131.26	19.8328	812.135	998.928
3.1553	963.793	363.284	1776.09	116.223	30.9635	804.444	998.523
3.157	965.339	364.409	1778.9	98.0938	40.2728	803.028	1006.42
3.1587	967.587	368.484	1779.18	91.7698	40.2728	807.682	1017.14
3.1603	968.712	374.246	1777.63	102.45	29.9517	815.778	1022.4
3.162	968.29	377.9	1777.21	121.985	16.1901	822.254	1017.75
3.1637	967.165	377.479	1781.01	135.757	11.3331	823.67	1007.43
3.1653	967.447	373.825	1787.61	133.93	19.8328	818.813	1000.55
3.167	969.695	370.452	1792.81	119.034	35.4158	809.909	1002.17
3.1687	972.365	369.749	1794.08	102.872	45.9393	803.837	1010.67
3.1703	974.474	371.154	1793.23	97.9533	42.9037	805.052	1018.76
3.172	974.895	371.857	1792.95	107.51	29.1421	813.147	1020.78
3.1737	974.474	370.733	1795.06	124.374	14.5711	821.646	1014.92
3.1753	973.349	369.046	1798.71	135.898	8.70217	823.265	1006.42
3.177	970.82	369.327	1802.23	132.806	15.583	817.396	1001.15
3.1787	967.165	371.857	1805.46	116.785	29.5469	809.706	1002.77
3.1803	963.371	374.808	1807.43	99.9208	40.2728	805.456	1011.07
3.182	962.95	376.354	1808.83	95.2831	41.8918	806.671	1019.37
3.1837	967.447	375.652	1810.24	106.948	35.4158	812.135	1020.99
3.1853	974.895	372.981	1811.08	126.623	27.5231	818.408	1013.9
3.187	980.376	370.171	1811.78	139.411	24.0827	821.444	1003.58
3.1887	980.798	370.171	1813.75	135.336	25.7018	820.028	998.321
3.1903	978.268	373.122	1817.83	118.753	29.9517	815.575	1004.39
3.192	975.598	377.057	1823.03	103.575	31.773	811.528	1018.15
3.1937	975.317	379.305	1827.38	100.623	30.154	812.135	1029.28
3.1953	977.987	379.305	1829.91	111.304	27.3208	818.813	1028.88
3.197	982.765	377.197	1830.76	127.325	26.7136	827.313	1016.13
3.1987	985.997	374.808	1831.04	137.163	29.1421	832.17	1000.14
3.2003	985.014	374.246	1831.18	133.509	32.7849	829.742	992.047
3.202	981.219	377.057	1833.29	120.861	33.392	821.444	997.916
3.2037	978.549	381.554	1836.94	109.899	29.9517	812.539	1012.69
3.2053	979.814	385.208	1841.44	109.477	23.2732	809.301	1025.24
3.207	984.452	385.911	1845.23	119.174	20.0352	814.159	1027.67
3.2087	987.263	382.959	1847.06	131.401	23.678	822.254	1018.76
3.2103	984.171	379.727	1846.22	137.584	32.1778	827.313	1006.42
3.212	976.019	379.446	1844.39	132.385	39.6657	825.289	999.94
3.2137	969.836	382.959	1844.81	119.034	40.88	819.42	1004.39
3.2153	971.241	387.878	1848.6	106.526	36.0229	813.956	1015.52
3.217	979.393	390.127	1854.79	104.558	28.3326	812.539	1023.62
3.2187	988.949	387.878	1859.71	114.677	24.0827	815.575	1021.8
3.2203	994.851	383.1	1861.96	130.276	26.7136	819.42	1011.88
3.222	995.273	380.008	1861.53	139.833	34.2015	821.646	1003.18
3.2237	991.338	380.43	1860.69	136.601	40.0704	821.646	1002.17
3.2253	986.138	384.224	1861.39	123.109	40.2728	821.646	1009.45
3.227	983.749	389.424	1865.19	109.477	34.8087	823.063	1019.17
3.2287	985.294	392.656	1870.81	106.245	28.535	824.277	1024.43
3.2303	989.792	391.532	1875.59	116.082	26.7136	824.277	1021.39
3.232	993.446	386.332	1877.41	131.26	29.5469	823.265	1011.88
3.2337	993.446	380.711	1876.01	140.957	35.011	822.254	1004.39
3.2353	990.775	378.181	1874.89	137.303	40.2728	822.254	1005.4
3.237	988.246	380.149	1876.71	123.671	42.9037	823.265	1014.51
3.2387	987.965	385.208	1880.65	110.602	40.2728	823.67	1025.03
3.2403	990.073	390.408	1885.14	107.51	32.1778	822.658	1028.88
3.242	992.322	393.5	1888.94	116.223	24.2851	820.432	1023.62
3.2437	993.164	393.5	1890.77	130.558	24.2851	818.813	1014.31
3.2453	992.603	390.408	1891.47	139.833	33.1897	819.825	1008.03
3.247	991.197	385.911	1892.31	138.287	44.9275	823.265	1010.26
3.2487	990.916	384.084	1895.26	128.45	49.3797	827.515	1019.77
3.2503	993.867	386.754	1899.76	118.331	42.499	828.932	1029.49
3.252	1000.05	392.375	1903.84	113.553	28.535	824.682	1032.72
3.2537	1005.95	396.029	1906.08	115.801	18.2138	817.396	1027.67
3.2553	1005.95	394.624	1907.49	122.547	21.0471	811.932	1016.94
3.257	998.927	389.424	1908.47	129.574	36.4277	812.944	1007.43
3.2587	990.214	384.927	1908.89	132.385	53.6296	820.432	1004.8
3.2603	987.263	385.63	1909.6	130.276	59.2962	827.92	1011.27
3.262	993.024	392.235	1910.86	127.606	48.3679	830.146	1022.4
3.2637	1003	400.105	1914.52	127.325	29.5469	825.694	1030.3
3.2653	1010.87	403.056	1920.14	130.276	16.5948	819.016	1027.67
3.267	1011.29	398.559	1925.34	133.509	18.821	816.789	1016.13
3.2687	1004.69	390.408	1928.29	133.93	34.4039	822.051	1005.81
3.2703	995.975	385.208	1929.27	130.276	52.4154	829.742	1005.4
3.272	991.338	387.597	1929.69	124.655	60.5104	833.182	1015.93
3.2737	994.149	397.153	1931.1	121.423	54.2368	827.92	1028.27
3.2753	1001.6	406.71	1933.07	123.952	38.4514	817.396	1032.72
3.277	1009.89	408.958	1936.44	131.682	25.0946	810.921	1025.64
3.2787	1013.54	402.353	1940.37	138.709	25.0946	813.956	1013.3
3.2803	1010.59	393.359	1942.76	139.13	37.4396	824.885	1005.2
3.282	1003.56	388.3	1943.33	133.087	50.3916	836.42	1007.63
3.2837	999.489	390.408	1943.47	125.498	51.8082	839.051	1019.77
3.2853	1001.88	397.435	1945.29	122.828	40.88	831.158	1032.72
3.287	1008.76	404.602	1949.09	127.325	27.9279	817.396	1036.77
3.2887	1016.07	406.71	1954.15	137.725	23.2732	808.29	1027.87
3.2903	1019.3	402.213	1957.8	147.703	31.5707	811.932	1012.89
3.292	1016.35	395.608	1957.24	148.406	46.7488	825.289	1004.19
3.2937	1008.76	393.359	1953.87	137.303	57.6771	838.039	1008.44
3.2953	1002.3	397.435	1951.9	122.547	55.0463	839.86	1022.4
3.297	1001.32	405.024	1955.27	116.223	40.6776	830.551	1035.76
3.2987	1007.5	410.926	1964.27	123.671	26.3089	817.194	1040.41
3.3003	1016.92	409.802	1974.66	140.254	25.7018	809.909	1033.53
3.302	1022.82	400.807	1980.85	153.886	39.6657	814.159	1019.37
3.3037	1020.15	390.829	1980.15	154.308	57.8795	826.908	1008.44
3.3053	1010.59	388.862	1974.24	139.973	65.7722	837.229	1009.05
3.307	1001.18	397.575	1967.5	122.125	58.4866	837.027	1019.77
3.3087	997.803	410.504	1965.39	113.553	42.9037	828.123	1030.9
3.3103	1003.42	417.25	1970.59	121.423	29.9517	818.813	1033.74
3.312	1014.95	412.753	1980.85	140.957	28.3326	815.575	1027.67
3.3137	1026.75	399.402	1990.55	158.384	38.6538	820.028	1016.53
3.3153	1032.8	387.035	1994.48	160.211	54.0344	829.134	1009.05
3.317	1030.55	385.911	1991.67	144.049	63.5461	835.61	1011.27
3.3187	1021.97	396.872	1986.33	121.704	60.1057	833.789	1023.01
3.3203	1013.96	411.629	1983.94	109.056	45.1298	823.063	1036.37
3.322	1012.7	419.358	1988.02	115.38	29.1421	812.135	1042.03
3.3237	1017.2	416.407	1997.57	137.725	24.2851	810.313	1035.15
3.3253	1022.82	406.85	2006.57	159.227	34.8087	819.016	1019.77
3.327	1025.77	398.699	2010.5	164.005	53.4273	832.17	1008.03
[truncated: 47,343 more rows]

## Sheet: Young Modulus
groups	Young Modulus
PEGDA10	10780
PEGDA10	9171.31
PEGDA10	12865.7
PEGDA10	11459.5
P8PVA3	9720.67
P8PVA3	10615.7
P8PVA3	7997.06
P8PVA3	8826.45
P8PVA3-B	13517
P8PVA3-B	14672.5
P8PVA3-B	15294.3
P8PVA3-TA	7348.98
P8PVA3-TA	6974.08
P8PVA3-TA	8091.45
P10PVA1	12328.2
P10PVA1	11372.6
P10PVA1	10533.2
P10PVA1-B	12738.5
P10PVA1-B	11944.6
P10PVA1-B	10954.2
P10PVA1-TA	9589.97
P10PVA1-TA	8999.97
P10PVA1-TA	9678.9

## Sheet: Toughness
	Toughness
PEGDA10	7800.05
PEGDA10	8741.65
PEGDA10	7193.31
PEGDA10	6789.32
P8PVA3	4775.84
P8PVA3	4587.36
P8PVA3	5329.29
P8PVA3	3993.09
P8PVA3-B	10334.9
P8PVA3-B	10165.6
P8PVA3-B	8738.88
P8PVA3-TA	1990.99
P8PVA3-TA	2198.87
P8PVA3-TA	3088.45
P10PVA1	9037.64
P10PVA1	5688.93
P10PVA1	3894.43
P10PVA1-B	6127.26
P10PVA1-B	4521.02
P10PVA1-B	11798.1
P10PVA1-TA	5429.91
P10PVA1-TA	4707.98
P10PVA1-TA	3989.99

## Sheet: Viscosity various hydrogels
Shear rate	Viscosity	Viscosity	Viscosity	Viscosity	Viscosity	Viscosity	Viscosity	Viscosity	Viscosity
1/s	mPa*s	mPa*s	mPa*s	mPa*s	mPa*s	Pa*s	Pa*s	Pa*s	Pa*s
	P10PVA1	P8PVA1	P6PVA3	P10PVA3	P6PVA2	P10PVA2	P8PVA3	P8PVA2	P6PVA1
0.00817	23800000	4618500	1658900	10400000	2927600	12000000	8546200	1815100	1121500
0.0145	13800000	3568700	1476500	8905500	2312800	7698300	5892400	1454400	919300
0.0215	9886000	2753100	1277200	7736700	1805200	5331000	4454500	1173900	745890
0.0316	7200800	2131800	1095400	5978000	1419900	3835400	3553400	947200	607550
0.0464	5285300	1663200	917880	4729400	1140800	2818800	2781200	766260	502640
0.0681	3905200	1299700	763220	3900300	918060	2089100	2188400	623770	419870
0.1	2912400	1017400	638570	3098200	747180	1579800	1749700	510350	354640
0.147	2225800	808700	521170	2473100	613280	1215400	1409500	422200	300800
0.215	1720400	653960	434170	1990500	506110	946940	1151400	349700	257310
0.316	1356300	541500	351230	1606400	419070	741720	927360	290220	218170
0.462	1049700	454230	277080	1300200	349170	582780	747720	242620	182150
0.68	826020	385390	215520	1058500	291220	464660	598270	203450	150590
1	655570	329450	159180	854880	240790	377640	480730	169760	122440
1.47	526070	270580	117420	686710	195050	308640	380180	140880	98195
2.15	423110	218540	83818	546290	154310	249530	298950	113920	76171
3.16	344370	172410	63454	427530	117890	194290	234840	85272	57591
4.63	271420	139020	48523	334650	84591	155890	181810	56832	43147
6.81	212980	113140	35405	267360	62831	130410	136090	39812	31554
9.98	166280	94483	20573	204630	45032	110490	99615	25613	22038
14.7	122990	77834	11040	154960	31867	93637	72215	18274	15130
21.5	82526	61097	7082	114820	21053	78627	49201	11352	10810
31.6	50712	40079	3802.6	83730	13831	64614	31127	5478.1	8792.1
46.4	40567	19055	2988.6	53105	9747.7	51672	17330	3698.4	7516.1
68.2	31906	11223	1868.3	35584	6298.4	34688	9416.8	2859.7	6615.5
101	15836	6597.2	1433.2	16008	2865.2	20405	4244.5	2094.3	5864.4

## Sheet: viscosity - resins
Shear rate [1/s]	Viscosity [mPa·s]	Viscosity [mPa·s]
	P10PVA1	P8PVA3
0.01	1134.1	13629
0.0147	706.7	14117
0.0215	514.7	12053
0.0316	388.72	9999.4
0.0464	234.23	8220.2
0.0681	171.39	6546.7
0.1	106.78	5256.6
0.147	68.594	4168.3
0.215	55.972	3303.1
0.316	46.709	2602.7
0.464	31.376	2023.7
0.681	22.991	1566.9
1	14.32	1217.6
1.47	10.766	938.87
2.15	7.2862	720.22
3.16	4.6536	529.97
4.64	3.8107	398.82
6.81	4.4321	289.33
10	5.4306	206.15
14.7	5.9121	148.05
21.5	5.8692	115.33
31.6	5.2674	94.377
46.4	5.2539	79.019
68.1	5.3993	68.74
100	5.2864	62.383

[truncated: 9 more sheets: Swelling, Cell viability, Larvae test, Degradation, FTIR, Rheology - viscosity after trea, DPPH, rheology-amplitude test, Micro CT test]
